# Supplementary material
Source: publisher figshare collection journal article supplement (https://rs.figshare.com/ndownloader/files/20114558)
Supplement: Supplementary file 1 [file 20114558]

## Sheet: RowData 1.1 Field
Table Row Data 1.1: Individual and mean oyster's valve opening amplitude in the field (Eyrac, Arcachon Bay, France at 44.66°N, subtidal conditions, 4 m depth (± tides)) over 18 days (05/03/2018, 17h local time (UTC +1) – 23/03/2018). Individual valve amplitude behavior was recorded every 1.6 second by valvometrey HFNI and average per half hour.
Continuous time (h)	Oyster1	Oyster2	Oyster3	Oyster4	Oyster5	Oyster6	Oyster7	Oyster8	Oyster9	Oyster10	Oyster11	Oyster12	Oyster13	Oyster14	Oyster15	Mean group (n=15)	Standard Error group (n=15)
0.5	82.225	92.684	0.42	96.436	94.606	0.267	92.821	0.035	0.023	84.488	87.666	95.173	88.706	0.164	95.686	60.76	11.4947
1	85.434	92.065	0.361	91.482	95.987	0.217	95.116	0.028	0.026	87.551	93.159	89.347	94.543	5.135	96.413	61.7909	11.4891
1.5	86.857	91.954	0.323	92.654	96.158	0.174	93.511	0.198	0.032	89.398	90.756	88.015	95.609	53.877	91.175	64.7127	10.7107
2	82.119	95.01	0.302	87.593	89.358	0.155	95.839	63.964	0.029	88.7	87.734	86.619	91.635	90.542	91.78	70.0919	9.53626
2.5	90.117	91.352	0.249	90.221	85.907	0.129	95.286	86.858	0.035	89.833	94.045	88.8	96.314	95.917	92.438	73.1667	9.79078
3	82.701	91.99	0.214	85.005	80.536	0.108	91.249	90.47	49.752	81.133	94.252	89.193	93.727	96.798	75.296	73.4949	8.22972
3.5	82.979	86.734	0.199	87.729	81.848	0.074	86.818	93.301	93.383	89.088	94.16	86.239	92.357	92.29	78.113	76.3541	8.07883
4	63.239	52.738	0.242	67.068	64.091	0.054	52.374	69.032	83.394	61.602	76.024	60.388	73.31	69.823	65.262	57.2427	6.33518
4.5	63.652	43.049	0.434	59.718	47.629	0.081	48.76	65.217	77.643	58.269	73.35	61.558	65.764	69.95	59.672	52.9831	6.02947
5	64.704	49.366	0.433	61.145	47.423	0.075	51.355	67.112	79.331	62.395	74.018	64.372	67.966	65.018	60.412	54.3417	6.07996
5.5	72.434	50.736	0.432	63.156	51.304	0.083	54.214	66.15	77.757	60.828	75.368	68.765	66.555	66.594	61.749	55.7417	6.16527
6	77.908	57.085	0.406	69.136	60.055	0.069	56.397	70.226	83.5	65.713	82.325	71.54	68.639	70.764	65.753	59.9677	6.58766
6.5	72.267	55.557	0.407	71.58	59.677	0.075	53.343	71.922	85.944	69.929	82.912	73.825	68.271	70.155	68.254	60.2745	6.67601
7	65.823	62.603	0.375	80.199	65.983	0.072	57.179	75.9	85.7	75.034	86.271	80.423	75.26	74.115	73.753	63.9127	6.99562
7.5	56.085	65.496	0.358	83.228	70.397	0.062	64.961	76.899	86.792	81.558	87.297	80.619	80.789	79.28	77.547	66.0912	7.25757
8	57.136	66.321	0.326	89.663	69.331	0.055	62.148	76.172	82.199	83.73	85.647	80.533	84.351	78.318	78.654	66.3056	7.31958
8.5	56.482	55.203	0.57	58.128	77.324	0.226	54.015	77.301	84.267	73.235	84.111	75.997	83.458	63.863	86.16	62.0227	7.09409
9	71.947	65.763	0.548	54.877	83.096	0.204	58.86	80.694	88.854	74.019	89.215	78.361	87.516	68.495	88.154	66.0402	7.42251
9.5	78.78	76.196	0.545	86.341	85.42	0.184	68.359	89.296	94.615	79.814	90.44	83.8	95.275	77.589	88.857	73.0341	7.84309
10	53.449	83.124	0.544	74.104	77.916	0.201	67.062	75.8	69.844	76.88	84.094	85.234	90.838	71.945	79.84	66.0583	7.25188
10.5	64.578	91.117	0.529	72.384	78.783	0.207	77.631	78.432	76.646	78.02	83.735	90.618	90.602	64.392	81.216	68.5927	7.45111
11	64.593	95.16	0.511	62.967	75.82	0.201	80.675	71.622	78.198	77.574	76.795	88.564	81.78	54.065	75.724	65.6166	7.30799
11.5	59.388	87.582	0.495	60.86	76.599	0.194	83.496	63.898	67.19	83.114	77.548	84.797	86.08	50.165	67.813	63.2813	7.20697
12	64.677	95.814	0.478	70.746	83.813	0.184	86.637	74.58	84.971	84.012	85.118	89.717	90.625	70.529	74.471	70.4248	7.67561
12.5	68.217	97.373	0.457	75.795	90.929	0.155	86.491	69.917	86.512	80.209	85.812	85.109	91.416	71.195	76.545	71.0755	7.73099
13	74.518	90.613	0.437	73.103	86.106	0.158	86.507	72.625	81.57	80.798	84.379	88.299	90.108	68.354	69.213	69.7859	7.53078
13.5	72.077	94.539	0.416	69.906	88.039	0.152	86.426	80.286	83.826	76.203	87.145	88.374	85.877	73.871	70.398	70.5023	7.60727
14	70.829	81.984	0.399	75.582	85.442	2.993	82.424	80.499	78.205	77.727	80.939	80.356	82.727	71.932	71.607	68.243	7.06725
14.5	79.155	92.778	6.981	71.172	85.05	39.213	89.355	88.941	87.629	83.582	87.808	89.83	86.966	71.017	77.931	75.8272	5.98855
15	76.215	89.836	50.682	69.55	76.806	82.517	92.179	88.792	88.085	83.921	89.663	92.1	89.965	73.865	72.38	81.1037	2.94331
15.5	68.545	86.088	87.447	67.261	79.619	74.887	91.479	84.168	81.544	89.24	86.991	88.811	90.252	76.849	73.125	81.7537	2.06084
16	61.057	67.364	66.24	58.388	53.175	70.996	51.272	71.873	69.003	56.339	65.529	65.161	70.896	64.399	49.432	62.7416	1.9151
16.5	58.131	40.377	61.632	23.037	63.959	68.829	56.108	50.34	76.832	50.568	66.723	47.212	50.928	58.398	59.318	55.4928	3.32465
17	67.225	49.325	62.012	26.166	69.231	73.088	59.255	52.295	80.517	59.018	73	56.92	64.929	65.618	62.76	61.4239	3.28404
17.5	64.51	43.821	62.542	25.118	70.807	74.291	56.623	52.043	78.591	60.022	69.347	61.543	64.436	60.973	62.23	60.4598	3.35152
18	49.153	40.761	61.402	29.852	66.912	65.499	55.119	50.615	68.708	53.051	72.182	56.634	59.786	64.065	61.441	57.012	2.89265
18.5	60.042	50.461	72.036	42.956	75.284	77.551	62.102	60.424	80.659	61.177	82.667	65.272	64.772	69.916	67.668	66.1991	2.79951
19	61.454	52.764	70.563	48.328	79.981	81.386	61.652	65.16	86.359	65.283	83.857	67.475	68.333	72.508	69.344	68.9631	2.79806
19.5	63.038	56.879	72.047	50.455	81.039	81.844	65.897	65.743	87.945	67.895	87.185	67.238	71.233	74.452	71.135	70.935	2.71051
20	67.416	51.14	75.669	55.752	80.665	80.346	67.84	71.322	90.859	68.651	86.279	70.419	74.176	75.993	71.594	72.5414	2.65996
20.5	65.109	53.571	75.519	59.71	84.888	83.7	71.42	73.886	95.509	72.318	83.119	73.201	80.33	72.371	74.36	74.6007	2.68054
21	40.865	38.279	59.764	32.196	61.507	71.343	44.209	46.766	65.386	57.851	58.918	45.833	59.997	54.878	54.366	52.8105	2.83234
21.5	34.252	37.044	53.213	30.048	55.876	69.447	50.222	40.661	53.894	55.331	44.637	42.415	57.669	48.422	43.696	47.7885	2.65635
22	65.45	61.613	62.876	49.998	68.652	73.792	65.421	61.129	70.139	62.296	66.603	68.674	71.283	62.391	61.432	64.7833	1.47219
22.5	76.545	75.843	69.239	64.467	72.206	80.334	74.203	70.907	77.223	68.96	81.626	74.346	82.259	71.973	74.063	74.2796	1.27537
23	50.985	73.248	56.175	65.927	71.862	76.321	71.753	69.894	74.977	72.367	70.835	79.301	86.553	70.426	76.778	71.1601	2.22952
23.5	39.11	72.054	54.728	58.832	60.708	72.178	70.393	54.44	68.325	69.312	52.126	69.097	82.176	69.8	69.198	64.1651	2.77021
24	42.506	73.576	56.778	66.118	66.294	77.846	78.441	54.63	72.536	69.74	65.248	74.98	86.753	70.763	72.802	68.6007	2.80729
24.5	52.339	76.094	58.64	59.919	74.128	74.749	85.445	58.678	68.435	76.542	62.503	71.352	86.402	75.524	74.824	70.3716	2.59126
25	53.375	58.051	61.172	72.79	80.181	74.578	86.376	62.301	72.666	80.241	66.571	69.75	87.287	72.326	76.35	71.601	2.56986
25.5	65.018	71.468	67.519	81.99	85.925	68.027	87.795	61.787	78.348	87.042	78.796	79.759	93.667	85.511	84.399	78.4701	2.47189
26	74.122	74.723	77.506	76.327	86.667	84.903	86.87	76.365	83.396	88.856	85.642	83.999	96.773	84.92	88.056	83.275	1.63058
26.5	81.724	78.751	81.45	79.825	84.776	94.567	86.296	79.266	87.928	91.576	83.798	88.162	95.042	85.859	89.912	85.9288	1.36509
27	86.898	78.882	91.775	86.727	90.957	90.845	90.712	82.117	92.398	91.815	92.783	95.222	93.718	90.777	95.985	90.1074	1.20615
27.5	96.713	77.318	95.93	83.582	95.295	96.177	94.179	83.746	94.147	96.903	93.545	95.975	97.742	92.225	96.911	92.6925	1.57668
28	90.618	80.811	86.059	88.561	93.83	90.529	88.612	83.681	92.872	74.104	93.755	88.098	93.419	92.627	88.552	88.4085	1.41518
28.5	77.134	40.944	67.357	46.245	83.252	85.726	60.033	56.898	81.347	69.466	87.646	48.958	79.616	73.59	79.989	69.2134	3.92756
29	80.72	39.758	74.106	39.841	83.054	84.447	57.32	50.465	79.363	72.877	82.6	68.727	76.12	70.803	77.412	69.1742	3.9137
29.5	75.933	50.727	76.32	33.654	83.186	86.193	59.259	51.434	78.889	72.376	81.676	69.338	76.531	71.271	77.692	69.6319	3.7712
30	82.672	56.681	78.6	58.059	85.401	84.7	62.849	60.382	83.239	75.747	84.737	72.55	78.928	77.62	77.708	74.6582	2.63234
30.5	72.227	58.94	74.295	53.284	82.04	87.246	63.087	61.981	87.365	77.684	87.678	70.797	72.68	78.856	80.379	73.9026	2.77596
31	75.714	60.878	73.8	54.887	84.798	84.083	60.415	64.86	87.216	76.474	88.67	72.719	73.185	83.91	80.641	74.8167	2.7233
31.5	76.21	56.854	73.251	41.128	84.388	83.017	57.853	62.18	84.1	77.198	86.519	73.111	73.975	83.637	81.038	72.9639	3.35638
32	72.051	49.809	70.718	42.439	77.049	80.939	57.454	60.721	83.183	76.678	83.963	70.129	70.912	81.772	78.308	70.4083	3.23975
32.5	69.633	67.359	63.18	65.267	72.654	75.709	33.89	63.532	73.054	67.272	65.32	59.114	81.539	82.859	76.232	67.7743	2.99335
33	66.92	70.143	63.069	70.732	73.218	76.452	39.748	67.137	72.342	67.926	78.057	61.099	81.439	83.904	74.261	69.7631	2.6982
33.5	72.602	72.198	65.714	74.08	75.398	77.34	42.991	71.538	73.119	65.68	82.352	65.009	86.771	86.363	75.668	72.4549	2.72388
34	19.557	55.221	21.07	73.758	55.2	63.269	27.139	54.537	6.237	39.352	54.695	37.803	49.607	50.226	38.841	43.1008	4.73682
34.5	32.573	58.148	46.206	58.387	63.969	69.871	38.68	59.049	0.023	49.226	63.507	48.038	75.031	57.919	43.451	50.9385	4.70985
35	55.071	63.549	59.766	69.169	69.691	75.059	34.711	68.862	43.93	44.372	63.927	62.07	84.499	70.91	59.684	61.6847	3.35141
35.5	59.282	86.31	58.679	70.736	63.353	74.43	53.599	51.931	73.06	66.866	72.288	61.255	79.88	75.08	69.594	67.7562	2.50509
36	64.35	88.5	56.739	71.627	62.233	76.531	50.163	64.94	76.768	69.244	68.407	63.441	81.641	73.231	72.839	69.3769	2.50227
36.5	71.011	84.704	61.436	71.342	56.922	78.682	54.731	73.374	77.635	67.362	72.111	61.217	86.4	74.737	76.984	71.2432	2.43697
37	76.152	88.707	69.099	79.909	77.561	85.286	65.235	77.423	82.07	70.535	79.93	71.402	89.828	81.008	81.612	78.3838	1.82159
37.5	79.856	90.116	71.909	76.358	84.291	83.567	70.17	79.005	83.272	71.896	83.508	81.367	90.348	80.023	83.326	80.6008	1.56315
38	81.033	91.096	73.419	86.661	86.331	88.192	67.39	81.116	85.3	73.14	82.832	80.278	90.651	85.238	83.105	82.3855	1.72892
38.5	80.245	91.253	77.118	89.325	88.251	91.437	75.409	82.113	84.697	77.062	86.393	86.791	92.367	88.617	85.822	85.1267	1.43246
39	81.771	90.284	70.966	88.992	88.021	90.358	76.078	82.799	83.051	77.257	85.552	91.369	93.968	90.595	86.646	85.1805	1.67913
39.5	80.301	90.091	67.482	86.402	84.433	89.788	79.245	83.939	79.869	79.207	77.254	82.249	94.539	89.243	85.114	83.2771	1.69912
40	84.325	88.796	76.043	80.862	85.519	85.566	81.195	87.844	82.756	82.411	77.746	85.396	96.136	88.935	88.112	84.7761	1.28788
40.5	82.579	83.337	72.424	85.883	83.921	83.764	69.465	82.714	79.679	76.261	81.993	63.476	90.768	89.069	82.09	80.4949	1.88689
41	76.546	73.171	62.158	73.599	77.977	81.13	53.924	73.791	80.166	68.922	78.757	56.038	84.135	82.426	77.535	73.3517	2.39671
41.5	76.416	71.187	62.204	71.683	77.093	80.649	47.621	74.425	83.101	70.291	76.438	54.132	85.223	81.364	80.503	72.822	2.76629
42	76.552	68.272	66.132	74.718	79.137	77.816	52.684	73.48	82.95	69.212	79.007	58.056	81.162	83.579	81.364	73.6081	2.36504
42.5	69.302	73.565	63.964	75.528	78.276	80.66	55.618	73.424	84.018	72.353	79.746	58.265	81.458	83.982	82.207	74.1577	2.32185
43	80.136	73.864	70.746	81.961	83.642	83.232	61.717	77.404	85.949	74.609	86.646	65.543	84.346	88.71	84.274	78.8519	2.07335
43.5	80.797	74.831	68.274	81.065	81.637	86.723	53.92	75.963	86.197	71.201	88.053	64.586	81.339	89.798	83.081	77.831	2.5498
44	82.989	75.507	72.459	85.981	85.369	87.463	57.834	78.226	88.453	75.076	90.021	67.934	85.761	93.892	88.305	81.018	2.5091
44.5	81.866	75.672	70.721	85.82	88.13	89.399	60.334	79.838	86.11	72.591	92.85	69.932	88.875	96.649	88.983	81.8513	2.60709
45	71.885	76.607	64.781	76.162	88.094	84.638	53.065	75.116	85.306	69.711	84.533	65.899	88.164	93.822	85.609	77.5595	2.85633
45.5	63.033	62.635	53.146	74.691	79.227	76.797	49.292	69.533	81.425	67.425	73.264	69.809	87.182	90.975	84.027	72.1641	3.06963
46	72.414	77.472	51.476	86.43	77.016	67.04	49.124	71.923	77.002	72.659	67.732	77.638	84.099	89.896	79.743	73.4443	2.93049
46.5	55.266	80.328	51.48	86.512	81.061	56.587	54.604	73.184	74.108	74.459	46.387	73.82	87.402	83.039	81.416	70.6435	3.58217
47	58.307	83.483	54.73	77.467	83.779	77.51	44.897	71.845	75.6	72.586	47.963	79.445	87.32	83.406	81.306	71.9763	3.55173
47.5	65.781	88.829	63.291	71.254	81.639	76.616	50.084	71.244	77.536	56.166	60.142	79.708	84.312	64.218	82.603	71.5615	2.92483
48	44.237	89.216	49.776	67.775	72.106	75.719	61.441	63.66	66.226	67.37	66.495	69.324	78.493	74.087	57.581	66.9004	2.87054
48.5	56.282	88.234	51.282	70.321	56.904	74.385	62.649	66.308	65.719	70.441	69.238	69.69	69.164	72.069	74.319	67.8003	2.28846
49	53.138	90.272	57.986	75.711	47.216	77.455	67.092	74.579	61.839	73.846	72.515	71.299	81.54	74.691	69.43	69.9073	2.86284
49.5	58.11	91.324	61.632	75.609	62.574	72.353	71.553	71.363	67.701	73.267	69.59	64.763	81.476	70.326	67.977	70.6412	2.11097
50	75.305	90.069	71.833	80.726	77.845	82.293	78.092	80.63	80.312	79.567	81.467	65.679	91.495	82.092	82.848	80.0169	1.62823
50.5	80.264	91.616	71.97	82.488	86.872	86.91	78.318	85.945	83.466	81.778	86.075	74.412	95.907	82.629	88.588	83.8159	1.59971
51	81.764	90.349	80.344	82.464	92.186	91.128	87.463	87.587	84.975	82.705	90.032	80.295	92.496	90.765	91.826	87.0919	1.17968
51.5	92.064	93.807	83.699	85.8	96.473	93.107	91.019	92.042	92.031	85.642	91.573	87.679	93.182	93.45	94.68	91.0832	0.951605
52	95.743	92.779	91.89	91.171	94.856	95.518	95.42	96.145	96.099	92.452	96.559	94.445	90.303	96.163	98.01	94.5035	0.580684
52.5	80.347	93.959	83.583	88.264	88.026	92.397	84.446	95.465	82.158	92.031	90.38	81.439	92.181	85.573	86.964	87.8142	1.24282
53	83.057	84.634	76.461	86.207	91.429	91.59	64.893	83.552	86.352	79.007	97.233	64.901	93.314	89.417	86.684	83.9154	2.42469
53.5	83.894	71.845	71.438	69.054	81.701	87.01	54.912	75.881	84.952	75.283	89.471	62.656	88.404	82.063	86.662	77.6817	2.62691
54	88.54	74.146	73.997	76.278	83.925	87.463	59.455	77.375	88.28	79.797	91.618	66.859	88.909	87.136	86.025	80.6535	2.3841
54.5	86.396	70.881	70.403	73.612	85.121	86.788	54.343	77.434	90.004	79.984	88.745	66.727	88.854	84.734	85.55	79.3051	2.64686
55	85.885	80.055	69.469	72.664	83.459	89.07	58.058	75.85	88.887	81.03	86.907	64.084	86.233	90.277	86.752	79.912	2.54789
55.5	85.631	73.194	71.042	67.179	83.199	87.058	55.724	77.893	86.3	72.941	85.219	64.034	83.047	90.755	79.221	77.4958	2.56314
56	65.906	66.947	51.415	55.107	74.742	75.701	38.227	66.306	80.718	69.565	74.24	55.666	75.791	76.292	70.629	66.4835	3.00633
56.5	67.851	75.13	58.317	57.672	74.988	70.977	67.682	68.971	76.968	68.846	79.306	71.902	82.21	74.024	77.592	71.4957	1.80097
57	85.153	84.997	69.856	78.218	84.065	81.179	77.199	77.494	76.299	76.521	87.579	79.887	89.78	78.212	82.227	80.5777	1.3304
57.5	72.923	85.478	58.353	67.469	81.848	70.382	72.505	72.693	69.415	69.326	80.929	75.265	89.415	67.917	78.178	74.1397	2.05088
58	18.504	60.614	41.863	30.797	63.891	53.987	29.627	54.707	58.816	45.787	44.68	56.906	71.213	33.097	53.052	47.8361	3.79971
58.5	50.494	71.058	60.126	0.732	73.736	70.482	60.613	67.943	69.041	64.143	43.55	61.016	74.995	45.968	59.972	58.2579	4.79788
59	49.438	70.175	50.526	55.589	67.322	52.87	64.489	66.728	63.244	69.524	33.799	56.633	79.993	64.927	63.066	60.5549	2.86357
59.5	54.847	76.236	54.379	75.685	75.089	73.213	71.824	58.991	53.802	48.643	51.603	46.253	82.66	44.692	71.047	62.5976	3.31403
60	57.602	82.034	61.849	81.747	72.742	78.752	78.636	70.724	66.407	69.114	70.644	68.744	78.007	63.504	66.823	71.1553	1.92013
60.5	59.644	83.018	64.443	82.676	70.214	79.054	78.798	65.269	67.144	66.942	69.09	72.893	78.45	66.654	51.077	70.3577	2.30481
61	44.457	82.003	36.551	80.641	76.753	78.629	77.529	61.06	61.716	68.733	69.4	71.831	65.695	65.811	67.033	67.1895	3.29906
61.5	65.071	84.454	59.032	80.311	85.6	86.795	84.697	77.807	75.678	74.494	79.789	78.712	86.405	69.522	78.444	77.7874	2.09008
62	66.071	83.91	66.051	79.207	89.788	84.115	89.514	80.905	75.266	74.41	82.331	77.719	88.907	72.041	79.013	79.2832	1.96254
62.5	67.4	82.197	67.726	82.248	89.233	86.892	93.677	82.786	77.195	78.096	81.887	79.215	86.084	74.434	83.179	80.8166	1.86526
63	75.341	82.621	66.759	81.968	86.313	87.109	93.895	80.34	72.865	78.422	81.612	83.866	84.371	74.574	79.389	80.6297	1.69771
63.5	82.695	86.406	67.192	73.702	80.577	89.025	89.152	80.886	80.81	79.15	83.592	84.571	87.542	70.734	85.573	81.4405	1.68493
64	76.599	85.136	71.363	77.349	85.036	91.737	90.377	83.742	78.754	79.812	86.332	78.901	88.42	77.32	86.274	82.4768	1.5003
64.5	83.433	85.898	81.273	77.547	91.187	91.846	96.011	89.983	87.807	85.581	87.058	86.51	94.569	86.629	91.389	87.7814	1.26801
65	87.688	83.386	79.997	82.993	85.63	89.561	86.656	93.795	81.568	84.986	87.927	88.464	89.641	86.802	86.902	86.3997	0.903809
65.5	88.105	80.476	75.074	84.201	82.843	82.234	85.441	87.327	85.987	77.053	89.243	77.318	83.741	88.61	85.833	83.5657	1.13972
66	93.281	76.949	73.947	82.198	84.272	81.989	81.314	80.54	84.083	75.649	96.796	78.594	86.31	87.88	83.906	83.1805	1.59837
66.5	87.095	76.635	72.155	84.723	86.852	85.253	81.573	80.202	86.796	78.8	85.769	77.021	88.99	91.229	82.757	83.0567	1.35702
67	84.234	80.539	70.155	79.689	82.008	83.575	77.367	79.275	85.983	73.494	87.66	76.461	89.401	84.476	81.796	81.0742	1.35077
67.5	80.256	75.936	67.21	72.572	78.548	83.599	73.888	77.285	87.646	77.474	76.213	73.046	89.836	83.57	80.133	78.4808	1.53927
68	73.976	79.258	63.621	78.75	80.759	82.86	73.331	78.588	86.32	74.559	86.146	71.899	89.216	88.158	79.486	79.1285	1.79311
68.5	68.894	73.432	61.054	71.075	77.34	84.01	68.925	73.857	82.932	68.447	83.188	70.952	86.55	80.909	78.697	75.3508	1.88217
69	76.974	79.591	64.936	74.987	83.215	86.054	72.862	79.514	87.315	74.966	78.828	74.485	89.3	80.992	81.473	79.0328	1.61216
69.5	86.868	83.699	77.051	87.076	89.335	92.235	78.403	84.833	92	79.173	89.646	81.521	92.255	90.004	88.559	86.1772	1.33374
70	87.456	73.711	76.36	82.767	88.077	94.399	83.363	90.295	93.131	78.715	75.633	83.8	91.758	90.059	92.073	85.4398	1.76584
70.5	84.92	73.702	80.04	91.916	95.783	93.954	68.643	88.947	94.665	77.214	77.949	87.085	93.791	90.886	92.92	86.161	2.22774
71	87.245	69.451	69.412	87.871	90.561	90.876	70.335	88.192	94.368	74.785	73.879	89.041	92.158	73.621	94.507	83.0868	2.52327
71.5	79.094	77.74	73.937	89.612	87.957	85.379	61.351	92.229	93.932	78.611	76.779	88.748	94.556	74.572	92.31	83.1205	2.44405
72	85.407	81.625	80.06	88.863	91.21	85.817	57.808	93.619	91.888	78.635	81.736	89.573	91.8	71.784	90.437	84.0175	2.44882
72.5	67.779	58.248	69.436	73.169	79.388	73.946	62.943	88.395	86.905	72.628	79.973	79.144	68.926	78.215	84.804	74.9266	2.23049
73	73.132	82.377	79.935	74.519	61.827	77.519	61.913	87.724	87.53	75.023	82.23	80.934	83.218	79.535	88.59	78.4004	2.115
73.5	84.715	85.063	88.742	78.221	85.088	83.634	75.642	90.613	90.556	81.248	83.563	87.69	88.268	71.538	94.36	84.5961	1.56191
74	88.3	86.473	84.554	84.086	86.492	85.944	80.491	89.174	90.791	83.362	89.477	88.228	91.088	83.291	87.017	86.5845	0.780837
74.5	76.477	88.172	79.876	89.973	82.801	87.155	82.169	88.062	79.79	83.107	88.556	92.05	82.586	81.171	43.149	81.6729	2.97577
75	83.746	92.409	87.866	93.18	91.855	93.539	92.733	91.479	83.443	93.522	93.036	95.289	93.133	87.502	70.16	89.5261	1.66777
75.5	88.306	97.034	85.12	88.426	94.117	94.933	90.644	95.271	88.791	92.616	91.721	95.425	95.606	89.362	71.73	90.6068	1.61676
76	90.689	94.186	84.594	87.42	89.168	95.573	92.88	92.118	85.564	95.49	90.161	98.66	95.031	83.357	71.263	89.7436	1.74953
76.5	88.274	92.409	88.423	86.871	86.739	92.791	95.222	94.294	85.906	97.138	92.182	94.616	96.45	83.581	72.867	89.8509	1.62566
77	67.578	76.557	66.413	82.237	77.375	79.532	61.643	79.069	66.95	82.798	67.824	86.782	86.152	73.665	47.363	73.4625	2.73877
77.5	71.169	76.829	63.83	82.96	75.221	84.379	80.813	78.657	55.375	75.319	69.681	77.888	66.626	73.173	59.427	72.7565	2.1862
78	68.209	76.733	63.921	86.25	78.247	86.174	75.559	71.709	65.984	59.337	78.452	70.237	86.895	85.226	59.838	74.1847	2.46129
78.5	80.832	78.004	78.462	84.745	86.451	90.872	76.965	80.32	77.738	75.47	89.632	83.335	93.049	90.8	72.088	82.5842	1.65841
79	84.251	81.257	79.959	90.227	87.608	91.257	78.993	82.021	82.282	76.038	91.07	84.213	94.29	91.837	77.715	84.8679	1.49482
79.5	70.428	66.476	59.884	78.826	73.715	59.739	71.255	75.979	75.537	61.194	79.607	73.47	73.361	75.315	55.672	70.0305	1.95985
80	77.979	80.088	72.16	94.979	85.183	88.167	76.114	84.164	81.167	76.114	88.172	77.855	86.133	88.881	71.537	81.9129	1.74165
80.5	81.841	89.479	66.848	89.138	79.567	80.33	75.739	75.501	76.908	71.939	88.589	76.219	84.997	85.023	70.316	79.4956	1.80097
81	84.639	88.16	61.84	80.03	85.664	82.179	76.763	72.841	77.468	78.274	86.379	78.035	90.285	78.819	80.365	80.1161	1.3304
81.5	71.505	85.684	63.54	80.994	74.685	72.77	74.698	74.616	68.644	72.17	81.263	72.526	80.339	69.412	68.837	74.1122	2.05088
82	42.297	74.099	37.213	63.274	52.625	47.71	60.972	61.742	68.258	61.381	66.941	45.791	63.242	58.202	53.615	57.1575	3.79971
82.5	62.133	83.774	58.176	68.572	79.314	75.951	69.225	70.971	74.203	74.514	73.077	67.922	85.483	71.733	69.734	72.3188	4.79788
83	71.179	86.425	64.283	59.361	84.099	75.027	73.266	75.201	75.741	81.435	72.496	76.239	89.146	57.999	76.031	74.5285	2.86357
83.5	61.737	76.265	56.048	64.854	82.213	75.852	68.021	71.931	70.78	77.84	72.979	56.651	86.531	24.872	71.749	67.8882	3.31403
84	69.837	69.232	66.678	70.793	75.88	73.394	72.558	75.694	70.64	72.028	75.155	51.397	81.321	0.313	70.41	66.3553	1.92013
84.5	68.613	34.025	67.208	53.467	77.442	71.234	67.023	72.685	71.435	61.936	56.041	61.482	71.046	0.294	70.296	60.2818	2.30481
85	76.795	7.16	74.937	75.08	83.73	80.735	79.577	78.08	73.511	77.283	71.358	73.76	67.292	37.53	76.938	68.9177	3.29906
85.5	59.72	69.32	67.319	72.15	83.426	80.871	79.45	75.933	66.55	74.907	74.61	75.611	74.817	65.571	70.772	72.7351	2.09008
86	70.147	86.721	75.326	78.424	91.2	86.43	88.084	83.331	74.694	84.863	87.555	84.352	89.52	75.84	82.431	82.5945	1.96254
86.5	73.174	91.487	72.146	80.625	87.514	83.772	76.109	80.711	72.951	85.739	89.341	82.478	87.63	73.388	82.991	81.3371	1.86526
87	76.9	95.69	72.368	80.343	88.866	82.751	75.087	82.635	67.585	78.447	87.468	84.911	83.066	69.658	76.173	80.1299	1.69771
87.5	83.972	93.97	69.652	80.961	93.475	85.257	86.715	84.151	78.467	82.744	84.716	89.431	88.617	75.097	86.879	84.2736	1.68493
88	88.771	79.302	75.741	76.058	88.98	84.919	83.898	87.427	82.817	86.804	85.905	92.86	90.593	76.907	90	84.7321	1.5003
88.5	87	93.18	79.355	83.608	86.693	83.311	79.587	85.933	84.501	80.929	90.807	91.303	89.871	78.973	86.285	85.4224	1.26801
89	82.368	91.677	79.028	83.909	91.105	83.164	85.377	83.975	86.06	80.522	91.6	71.88	93.614	84.06	87.28	85.0413	0.903809
89.5	82.094	84.403	81.302	80.059	84.28	75.78	78.663	70.488	87.153	79.544	86.512	80.406	73.218	82.058	86.523	80.8322	1.13972
90	64.334	75.999	68.75	77.462	75.672	70.339	83.067	83.177	80.36	75.796	75.046	78.686	64.415	81.267	80.288	75.6439	1.59837
90.5	77.08	84.928	74.716	73.96	83.397	81.774	69.941	81.551	83.495	74.073	86.076	80.158	73.963	91.545	83.644	80.0201	1.35702
91	78.231	80.29	79.731	81.116	88.252	85.877	67.99	79.839	84.345	76.53	88.923	75.819	79.091	89.762	84.069	81.3243	1.35077
91.5	79.668	85.914	75.819	84.586	89.081	85.709	75.769	78.95	85.366	74.6	87.764	73.149	83.024	89.347	82.45	82.0797	1.53927
92	83.796	76.828	71.635	71.941	86.737	83.069	72.52	77.642	84.78	75.6	75.154	76.739	81.914	83.552	81.51	78.8945	1.79311
92.5	83.582	77.236	64.484	71.647	69.276	77.47	70.077	75.995	86.883	78.893	76.106	80.02	68.173	82.572	79.601	76.1343	1.88217
93	84.943	79.254	66.632	72.96	76.602	84.735	73.085	76.114	82.752	76.176	76.215	80.507	78.529	86.077	80.153	78.3156	1.61216
93.5	91.996	80.56	75.54	77.332	78.366	85.245	75.115	82.13	88.322	80.34	85.579	82.852	80.709	92.55	86.826	82.8975	1.33374
94	85.812	74.992	61.594	77.274	76.549	82.888	71.712	86.957	89.79	83.095	80.654	84.08	81.912	85.331	88.055	80.713	1.76584
94.5	81.814	81.59	72.381	79.652	83.903	87.683	79.327	90.128	90.947	80.908	79.89	86.979	81.456	75.819	85.532	82.5339	2.22774
95	84.747	86.262	78.362	85.877	85.797	90.24	82.167	92.45	93.471	84.453	83.461	92.846	86.843	67.695	89.691	85.6241	2.52327
95.5	92.195	77.552	79.98	88.337	92.263	91.224	80.413	95.192	92.433	87.043	85.363	95.354	82.04	71.895	94.975	87.0839	2.44405
96	86.435	83.507	80.629	81.05	86.238	90.192	73.671	96.026	93.665	93.044	89.152	92.826	80.34	71.18	93.946	86.1267	2.44882
96.5	75.836	86.187	64.403	79.886	90.671	86.435	73.191	90.447	91.376	91.241	69.451	89.411	82.567	65.454	93.242	81.9865	2.23049
97	56.985	80.917	54.564	75.24	87.903	83.637	78.015	81.937	88.843	85.341	62.451	77.7	81.209	62.423	88.802	76.3978	2.115
97.5	44.23	88.289	49.17	70.65	89.011	91.657	66.835	81.898	86.605	77.182	77.686	65.317	80.237	63.729	81.265	74.2507	1.56191
98	13.321	61.529	44.012	59.429	54.904	74.617	64.34	49.651	43.954	59.443	61.051	63.729	71.367	66.962	66.141	56.9633	0.780837
98.5	32.863	77.719	54.999	71.519	80.043	84.744	56.106	66.432	57.871	70.088	74.688	79.381	80.361	65.252	63.756	67.7215	2.97577
99	58.243	87.82	68.911	79.466	80.989	88.156	86.937	77.902	65.902	73.539	86.471	88.282	84.442	70.972	70.359	77.8927	1.66777
99.5	60.994	78.929	71.576	76.477	81.771	90.079	93.733	79.843	64.28	77.239	82.246	64.283	81.526	70.077	65.624	75.9118	1.61676
100	59.91	84.522	70.29	77.137	85.663	89.494	89.168	80.5	65.085	62.866	83.201	77.683	87.453	74.109	57.939	76.3347	1.74953
100.5	74.71	95.548	75.665	82.727	90.921	92.073	95.343	87.1	74.83	86.969	87.867	85.206	95.71	69.134	62.494	83.7531	1.62566
101	79.141	91.038	74.11	78.313	90.551	92.857	94.437	86.6	77.066	90.883	89.687	89.732	95.91	72.868	73.115	85.0872	2.73877
101.5	81.339	95.814	82.323	77.785	88.392	91.01	93.98	86.132	78.202	92.437	87.491	90.839	92.977	76.34	77.815	86.1917	2.1862
102	84.359	93.476	81.202	80.753	87.678	89.93	92.294	85.61	80.059	91.09	89.643	90.129	96.733	76.578	78.104	86.5092	2.46129
102.5	85.709	87.441	86.111	78.649	82.95	87.355	91.943	89.33	78.723	84.348	83.686	94.322	89.644	68.546	78.447	84.4803	1.65841
103	81.914	87.592	77.144	90.016	81.862	83.627	82.762	85.32	76.466	75.225	87.841	86.703	87.949	72.541	73.466	82.0285	1.49482
103.5	81.551	83.549	71.68	96.103	79.206	85.429	83.706	80.484	77.088	74.544	92.205	80.354	84.902	83.721	76.233	82.0503	1.95985
104	77.769	91.329	76.04	97.525	83.225	88.732	85.568	81.086	79.631	80.139	92.742	74.116	91.581	82.715	77.059	83.9505	1.74165
104.5	86.781	87.55	72.397	94.107	94.931	89.774	82.734	81.531	83.912	80.268	93.726	84.641	92.785	85.268	80.459	86.0576	1.62481
105	81.635	79.363	58.566	76.28	92.559	84.304	74.508	73.381	82.455	80.692	87.356	82.427	91.45	81.376	84.138	80.6993	2.11103
105.5	84.89	81.327	62.325	77.809	86.599	82.082	76.087	74.643	79.824	80.192	86.814	78.717	86.97	83.136	84.06	80.365	1.62688
106	93.504	86.522	66.408	78.008	91.873	83.545	75.786	75.848	81.597	66.848	89.865	84.457	91.456	86.673	87.521	82.6607	2.20496
106.5	90.03	82.731	71.253	67.743	93.212	86.57	77.8	78.508	79.555	79.463	92.014	89.55	90.759	94.487	84.179	83.8569	2.08803
107	85.574	71.028	60.516	47.482	77.951	74.02	75.889	75.779	74.896	78.061	84.341	83.24	79.014	89.695	76.615	75.6067	2.67204
107.5	82.291	74.717	63.457	42.959	75.427	48.351	73.139	78.014	61.578	68.436	72.788	82.71	74.768	68.564	61.058	68.5505	2.95642
108	71.023	78.864	58.934	53.669	81.785	75.713	70.2	67.953	67.72	71.286	70.957	85.066	72.625	53.201	67.63	69.7751	2.36365
108.5	58.089	67.838	54.582	38.692	77.407	75.611	54.398	70.893	70.924	73.612	47.989	71.059	54.752	42.945	73.984	62.185	3.27963
109	39.469	33.241	43.979	1.013	74.915	76.961	44.617	75.459	67.23	71.205	68.374	63.174	6.882	37.899	71.251	51.7113	6.37088
109.5	14.714	0.097	49.742	14.182	30.675	69.254	59.814	76.268	64.198	62.174	64.026	51.897	0.021	31.17	11.005	39.9491	6.88573
110	0.042	28.971	61.628	55.01	0.235	72.995	74.42	78.485	69.528	75.672	72.521	58.126	29.883	18.367	0.299	46.4121	7.80947
110.5	32.9	58.228	55.263	57.027	0.247	77.932	63.692	76.138	59.711	57.91	68.404	0.986	65.616	0.167	48.769	48.1993	6.94928
111	66.745	52.035	60.94	58.159	33.371	85.218	70.972	80.951	67.639	70.616	74.034	0.517	78.734	0.202	78.116	58.5499	6.95127
111.5	83.408	77.681	69.401	61.738	67.178	87.494	72.405	85.769	79.215	76.705	81.447	0.619	83.991	0.232	86.755	67.6025	7.30567
112	81.646	88.19	76.428	50.18	87.819	79.502	73.203	69.868	78.298	56.276	79.022	0.699	80.968	0.258	91.527	66.2589	7.46346
112.5	79.283	83.224	74.831	57.165	88.486	83.804	72.886	81.76	80.197	70.579	74.656	33.935	70.233	0.273	92.364	69.5784	6.13891
113	76.397	74.121	68.105	58.579	87.663	86.89	66.181	82.925	78.062	75.607	78.963	74.631	71.657	0.295	89.158	71.2823	5.50884
113.5	82.011	80.816	65.881	65.206	88.79	87.047	60.663	86.112	79.277	79.751	83.581	89.626	67.356	37.822	83.938	75.8585	3.62811
114	80.813	77.034	71.108	69.725	88.178	89.734	67.416	88.269	82.132	82.002	85.275	93.427	74.655	49.708	88.346	79.1881	2.93182
114.5	49.772	71.217	63.547	61.01	79.06	74.163	60.164	88.593	81.201	67.53	72.921	44.737	70.161	36.293	83.399	66.9179	3.79631
115	63.997	73.501	82.222	62.89	77.785	81.843	73.186	89.849	78.705	72.761	74.055	53.415	74.009	43.895	76.421	71.9023	3.0179
115.5	69.88	72.188	76.084	56.377	91.939	88.039	72.803	88.518	81.239	74.435	85.795	64.363	80.857	51.932	86.453	76.0601	3.06772
116	67.364	73.286	80.852	66.913	91.768	90.448	78.642	87.235	84.109	78.136	69.773	67.183	82.073	66.454	84.628	77.9243	2.30153
116.5	72.607	71.428	73.99	65.222	89.651	85.407	74.447	81.683	83.432	75.896	79.585	65.003	82.722	73.089	84.384	77.2364	1.89262
117	76.674	82.628	76.655	67.322	91.683	88.433	73.435	83.576	81.264	77.714	81.893	67.97	81.867	72.874	82.87	79.1239	1.77214
117.5	71.69	82.842	66.38	73.789	89.873	80.021	77.734	82.953	84.203	75.418	87.255	65.102	83.101	75.78	83.285	78.6284	1.87183
118	86.541	82.661	67.048	73.764	93.396	87.352	78.611	83.239	90.109	83.349	87.11	76.01	87.511	82.376	89.531	83.2405	1.79642
118.5	79.16	81.103	70.846	79.381	90.158	88.132	77.974	86.785	85.255	78.786	87.796	80.6	81.991	77.51	81.533	81.8007	1.30869
119	81.291	87.374	77.468	89.113	96.67	92.815	84.249	89.961	90.363	84.802	91.812	78.833	88.301	90.08	90.842	87.5983	1.37716
119.5	77.657	91.843	69.357	88.414	92.357	86.677	74.187	90.804	92.747	80.672	90.079	80.962	88.678	90.172	90.053	85.6439	1.88363
120	81.064	92.826	84.085	92.532	87.418	91.476	83.804	95.942	95.305	89.612	94.86	80.52	89.841	88.784	92.541	89.374	1.30137
120.5	88.908	96.232	87.623	95.865	88.491	89.416	79.386	97.928	91.055	91.503	94.241	79.059	90.279	85.603	91.884	89.8315	1.41725
121	67.258	97.053	69.605	77.064	88.563	87.992	79.083	92.171	87.582	82.736	87.351	69.605	83.925	63.472	87.887	81.4231	2.5852
121.5	59.053	87.685	55.246	71.803	80.102	85.31	71.168	76.195	78.018	72.409	72.543	68.176	81.266	36.445	76.154	71.4382	3.35893
122	43.435	76.319	53.425	71.913	82.303	82.16	71.992	71.931	74.203	78.027	70.146	66.724	79.344	25.488	83.517	68.7285	4.16955
122.5	56.045	89.662	69.772	78.43	91.295	90.576	55.559	85.778	82.223	80.933	80.159	66.693	86.725	35.844	90.103	75.9865	4.18773
123	57.557	89.778	78.874	76.946	66.595	94.846	84.276	87.031	78.392	75.992	87.564	71.791	93.363	36.311	84.449	77.5843	3.92824
123.5	54.855	92.396	70.967	74.392	73.308	84.685	93.631	84.602	59.394	81.994	84.184	70.022	82.734	49.953	74.851	75.4645	3.34279
124	63.196	96.134	74.782	79.377	90.578	95.42	94.391	90.532	79.819	86.961	93.042	78.084	93.96	66.548	86.135	84.5973	2.72265
124.5	54.561	89.133	81.783	77.075	84.719	89.888	93.554	90.082	74.813	87.501	91.287	69.778	95.056	65.427	82.584	81.8161	2.9753
125	61.722	87.939	75.338	74.657	63.422	59.57	95.391	90.586	78.108	87.001	87.104	47.989	82.316	72.286	86.95	76.6919	3.49513
125.5	44.664	88.12	74.898	71.61	69.653	79.306	94.961	89.474	71.443	85.442	68.464	64.144	85.89	66.912	82.128	75.8073	3.28509
126	48.772	80.567	72.163	70.653	71.599	86.143	89.405	83.963	68.399	84.294	76.058	64.275	82.576	70.62	81.008	75.3663	2.69583
126.5	37.15	73.974	55.648	61.879	66.427	83.056	75.201	72.021	59.565	83.981	62.688	66.696	72.811	62.03	58.728	66.1237	3.02611
127	67.016	88.804	67.74	77.609	80.185	89.338	87.075	81.879	71.373	89.589	78.576	69.106	89.377	70.827	77.932	79.0951	2.17571
127.5	65.656	82.835	68.024	85.296	77.266	89.689	89.416	81.541	70.696	89.024	79.765	73.827	87.537	74.625	79.116	79.6209	2.03321
128	52.576	75.797	71.073	89.122	71.663	87.981	82.748	83.793	67.683	79.637	75.529	69.278	82.313	72.969	80.649	76.1874	2.40212
128.5	72.671	81.169	77.807	97.412	84.065	90.902	77.665	89.753	82.199	83.678	87.182	76.625	87.138	84.066	79.919	83.4834	1.64148
129	65.483	80.746	77.568	97.838	78.915	96.498	73.737	85.18	86.012	85.106	96.92	71.679	88.906	89.375	84.277	83.8827	2.44164
129.5	71.509	82.619	73.946	96.486	80.47	95.383	78.571	85.257	88.473	85.548	94.305	70.299	90.856	94.627	70.126	83.8983	2.44617
130	75.775	82.608	76.006	92.334	64.898	95.461	79.144	86.231	84.626	86.856	92.796	75.401	92.069	93.092	86.369	84.2444	2.2255
130.5	71.389	54.142	63.087	74.186	67.903	86.239	68.316	74.371	81.644	76.794	79.777	55.419	88.849	83.72	81.869	73.847	2.7265
131	83.399	74.865	71.282	85.574	85.374	93.633	75.477	82.234	85.865	81.787	90.892	71.973	93.083	89.484	86.458	83.4253	1.86785
131.5	79.913	87.218	72.619	94.507	75.336	92.802	77.748	82.855	83.289	75.41	92.674	69.796	91.947	91.401	83.894	83.4273	2.09788
132	52.975	85.907	76.093	94.724	78.37	95.529	78.615	86.166	86.788	78.402	90.882	69.457	93.262	92.388	88.979	83.2358	2.93757
132.5	38.826	86.624	77.763	83.139	83.551	92.045	65.8	89.819	77.878	76.558	80.435	76.868	92.236	73.095	85.915	78.7035	3.41097
133	38.562	90.682	81.62	85.799	85.757	90.229	77.309	92.51	82.164	61.947	82.836	74.101	90.865	77.196	91.192	80.1846	3.64697
133.5	32.396	77.467	70.888	82.588	58.496	83.475	66.661	72.715	70.592	74.062	74.586	60.567	82.87	75.113	78.205	70.7121	3.33799
134	0.296	62.952	57.396	63.288	29.069	75.537	57.923	53.669	61.039	72.651	49.871	55.666	57.542	55.797	70.093	54.8526	4.8028
134.5	0.264	22.912	25.948	34.593	0.439	43.25	28.751	0.066	24.153	40.137	0.026	30.623	24.098	56.283	39.174	24.7145	4.54895
135	9.037	6.481	0.259	0.178	0.388	1.939	0.117	0.085	0.04	0.058	0.049	0.318	0.029	57.503	0.383	5.12427	3.80518
135.5	56.451	59.467	1.517	0.175	0.413	0.354	0.086	0.102	0.037	0.072	22.288	0.46	0.055	65.313	0.325	13.8077	6.4101
136	57.557	70.371	49.531	8.492	0.422	0.385	0.078	0.112	0.039	64.549	62.433	0.56	0.087	68.993	0.294	25.5935	8.10353
136.5	55.111	75.377	54.367	72.172	0.428	63.698	0.079	0.116	0.039	87.329	67.599	36.307	38.292	65.521	26.959	42.8929	7.97147
137	67.768	87.854	77.978	79.72	43.217	85.781	1.17	0.122	0.04	85.141	81.935	70.696	73.543	71.393	78.363	60.3147	8.45512
137.5	68.173	84.834	75.072	80.031	66.804	88.357	65.055	15.883	0.045	87.452	85.01	72.218	73.987	76.821	89.151	68.5929	6.71814
138	61.865	79.43	78.229	77.463	71.2	86.633	71.53	80.889	48.119	88.446	81.254	75.128	75.868	77.221	83.272	75.7698	2.59383
138.5	63.576	74.815	73.408	71.653	66.77	88.451	79.073	89.429	66.678	81.713	82.683	64.942	74.038	65.962	83.859	75.1367	2.23931
139	60.225	75.852	82.258	76.552	76.461	89.343	63.349	92.483	85.394	85.189	82.127	73.252	76.851	73.543	80.3	78.2119	2.25511
139.5	76.767	79.2	76.434	75.788	81.002	90.822	71.732	90.5	86.73	88.054	82.983	82.153	79.977	73.397	84.326	81.3243	1.53991
140	74.55	82.257	77.775	80	83.764	89.476	71.026	93.909	92.949	90.184	76.652	86.976	78.655	71.226	90.516	82.661	1.99061
140.5	67.093	77.272	76.705	81.536	70.216	92.175	76.145	90.407	88.042	87.26	77.915	81.76	77.468	73.103	82.884	79.9987	1.87908
141	82.305	82.547	87.593	84.346	71.141	91.241	73.368	92.895	88.646	88.299	81.229	85.522	73.539	76.685	84.836	82.9461	1.72517
141.5	79.158	70.564	63.926	89.986	78.135	88.495	72.148	92.076	89.49	89.778	86.874	84.959	76.706	86.38	85.526	82.2801	2.17408
142	80.751	81.001	73.765	89.37	86.188	93.222	74.537	87.175	89.676	89.536	88.197	85.078	82.545	80.895	83.841	84.3851	1.43726
142.5	95.107	87.591	75.957	89.111	90.739	89.476	75.764	82.237	86.917	77.207	89.921	80.051	77.979	87.027	81.313	84.4265	1.58659
143	74.053	69.974	74.654	73.747	91.275	88.196	72.885	84.886	88.45	74.704	82.947	77.074	74.688	87.312	85.493	80.0225	1.82693
143.5	76.034	71.347	81.147	85.228	89.15	87.17	75.503	85.452	93.657	82.597	84.731	83.452	80.99	86.958	89.915	83.5554	1.52749
144	66.278	70.435	70.058	78.423	87.845	89.94	73.288	85.766	92.626	81.563	86.209	86.762	80.291	86.138	90.541	81.7442	2.14824
144.5	67.941	78.018	71.074	75.056	90.908	92.74	72.25	92.44	92.267	86.286	83.105	85.145	81.433	82.432	91.974	82.8713	2.18584
145	63.186	82.552	75.584	80.925	96.131	96.625	71.79	96.742	93.83	84.353	89.487	91.051	83.947	75.47	88.704	84.6918	2.58004
145.5	73.854	85.544	80.037	90.284	92.856	93.56	75.24	95.229	96.097	86.468	88.516	96.7	84.209	86.431	91.828	87.7902	1.85039
146	75.224	90.707	76.392	93.91	95.214	94.358	80.371	95.464	95.153	85.289	88.291	88.255	83.626	83.358	94.7	88.0208	1.81375
146.5	37.253	74.348	45.724	81.556	75.875	74.271	62.886	60.881	61.617	65.103	54.149	77.608	70.867	67.953	65.118	65.0139	3.13195
147	25.655	76.606	50.391	71.489	58.753	74.971	76.724	55.774	34.022	59.38	62.154	79.878	70.237	68.437	46.774	60.7497	4.15211
147.5	22.772	78.805	50.5	79.086	64.981	76.615	80.897	43.12	33.838	46.69	73.694	75.114	71.694	69.746	60.917	61.8979	4.71708
148	0.077	84.561	67.273	74.664	67.873	83.351	83.543	70.893	63.008	68.717	80.078	83.308	79.152	79.18	68.74	70.2945	5.34297
148.5	5.16	91.263	83.521	79.161	79.959	86.006	93.288	83.892	73.508	77.339	88.729	85.946	86.068	82.142	76.024	78.1337	5.40481
149	52.451	91.735	81.036	84.151	85.194	89.983	87.35	88.029	79.051	80.567	89.954	92.348	89.033	84.328	82.945	83.877	2.48462
149.5	70.343	94.336	89.735	91.377	83.624	96.978	85.187	90.387	81.903	85.472	95.018	93.384	89.504	87.46	88.49	88.2132	1.69539
150	77.094	96.822	92.188	86.751	89.119	97.895	90.001	91.824	83.415	79.436	94.954	87.31	93.338	89.085	89.217	89.2299	1.52021
150.5	66.671	94.791	81.913	83.372	86.462	94.475	87.286	92.284	80.763	80.81	90.266	88.602	90.685	86.673	88.174	86.2151	1.81718
151	78.869	85.018	79.251	69.568	82.143	91.255	84.049	92.555	83.029	88.88	86.526	87.297	87.83	85.068	85.317	84.4437	1.45418
151.5	78.21	87.983	83.981	74.308	81.057	89.661	86.509	86.3	79.799	78.991	82.553	90.618	86.43	83.894	79.159	83.2969	1.20748
152	72.656	85.991	92.205	82.613	85.733	96.643	92.339	90.633	86.084	93.514	93.254	96.96	92.321	86.191	86.131	88.8845	1.61457
152.5	79.062	86.157	91.328	90.572	81.819	94.65	93.004	94.3	91.272	96.077	92.563	92.73	94.385	81.86	87.45	89.8153	1.37428
153	90.642	86.236	90.85	96.642	77.728	91.959	93.111	94.383	89.533	96.749	86.345	94.994	96.205	83.902	94.398	90.9118	1.39621
153.5	96.507	80.818	85.009	95.805	81.613	91.96	90.226	93.984	96.017	96.105	92.053	88.875	97.976	87.703	93.2	91.1901	1.40104
154	76.924	80.286	80.107	93.104	79.848	92.494	85.988	87.529	96.865	90.212	98.223	80.973	95.276	86.003	86.178	87.334	1.7626
154.5	62.425	77.988	70.521	84.976	80.017	92.035	81.561	87.419	94.624	90.314	94.562	85.428	96.586	86.005	91.144	85.0403	2.43573
155	60.982	71.739	69.77	76.471	77.855	85.351	77.884	90.279	90.134	87.469	88.432	84.311	92.672	85.312	88.568	81.8153	2.3415
155.5	67.112	67.459	65.031	66.653	69.315	74.027	72.898	84.643	83.929	73.331	83.19	77.379	77.504	74.901	77.625	74.3331	1.6627
156	72.55	66.786	66.694	63.331	63.104	77.609	73.682	85.011	84.559	76.502	79.65	78.007	83.163	75.239	82.485	75.2248	1.92126
156.5	44.371	74.942	75	71.865	49.068	84.688	80.057	89.364	87.688	83.714	85.001	81.584	87.465	82.998	82.421	77.3484	3.46284
157	42.495	72.371	67.357	70.555	62.997	78.818	77.182	85.81	87.044	76.505	70.084	70.828	86.797	83.82	76.499	73.9441	2.9385
157.5	32.995	65.238	74.008	72.753	67.947	82.362	79.687	82.108	86.117	75.513	85.401	72.261	91.865	84.239	79.287	75.4521	3.56359
158	24.721	50.249	70.908	53.588	60.774	77.543	72.17	56.814	79.711	71.489	75.983	57.489	86.604	78.589	70.086	65.7812	4.02516
158.5	12.617	18.268	70.293	12.179	53.29	56.499	71.321	43.982	78.955	68.987	77.564	58.67	69.892	74.533	73.768	56.0545	6.10892
159	0.08	0.13	65.384	0.169	11.034	71.812	70.326	64.42	78.952	55.859	77.373	53.217	44.816	73.49	60.702	48.5176	7.74794
159.5	0.06	5.834	54.879	29.538	0.216	60.485	48.614	53.043	58.872	62.506	51.164	58.529	5.067	42.614	15.704	36.475	6.28747
160	0.051	55.905	39.705	55.258	0.229	21.013	2.895	3.646	35.64	11.658	2.336	44.354	0.056	4.684	13.371	19.3867	5.41623
160.5	0.044	52.368	25.003	52.483	0.235	17.749	9.935	0.114	54.438	0.088	0.178	52.257	45.898	0.245	56.808	24.5229	6.37832
161	8.127	58.162	3.033	52.547	0.236	73.236	74.852	0.133	66.285	37.28	27.621	3.674	76.531	0.29	64.286	36.4195	8.11806
161.5	46.85	79.883	30.596	58.463	11.862	84.225	74.49	0.151	72.265	77.963	63.296	0.655	82.276	4.459	73.657	50.7394	8.34327
162	34.111	75.294	46.349	47.915	50.187	74.23	60.937	0.161	72.671	69.594	71.481	42.465	71.748	49.251	62.82	55.2809	5.22643
162.5	28.446	74.64	67.384	42.449	55.886	77.785	76.197	0.178	78.217	79.57	76.929	54.894	75.811	64.099	60.116	60.8401	5.78607
163	47.077	86.435	71.788	55.455	45.074	86.475	85.875	60.108	88.886	85.831	84.915	66.227	85.371	72.925	81.045	73.5658	3.94788
163.5	67.144	86.67	76.395	59.051	69.632	84.026	89.309	92.763	92.214	83.06	88.511	62.862	85.148	75.323	86.38	79.8992	2.80178
164	68.697	85.941	71.61	53.307	77.373	84.683	82.747	96.903	93.634	86.858	83.142	59.982	81.131	76.08	79.167	78.7503	3.01226
164.5	66.255	83.324	67.741	55.88	80.585	83.421	72.264	90.539	84.468	75.554	78.416	62.064	79.872	79.5	75.335	75.6812	2.41146
165	60.917	71.452	60.574	48.884	79.118	84.851	65.271	85.991	76.847	76.415	73.681	61.28	86.848	72.556	67.4	71.4723	2.79742
165.5	58.013	78.066	73.01	62.577	70.803	85.202	72.254	88.037	82.059	74.827	79.272	70.097	84.335	77.991	68.763	75.0204	2.16309
166	66.225	81.359	69.289	71.572	69.072	79.498	74.242	94.304	86.799	81.454	81.688	72.649	83.475	86.748	64.25	77.5083	2.23879
166.5	78.335	80.126	69.843	80.55	81.603	80.907	74.655	95.481	94.27	83.592	83.037	81.969	77.063	88.222	71.867	81.4347	1.85037
167	78.26	85.488	69.054	83.111	83.271	88.65	79.26	96.646	93.917	85.73	91.171	78.129	85.911	89.967	84.026	84.8394	1.7992
167.5	76.697	79.969	70.464	83.602	83.595	72.692	77.594	91.462	92.375	87.796	84.378	82.139	80.381	85.48	77.302	81.7284	1.61632
168	75.444	86.529	69.503	82.146	91	79.564	81.863	95.116	92.903	88.687	91.6	82.585	89.389	96.621	82.235	85.679	1.952
168.5	78.394	87.1	68	81.884	91.037	84.356	87.526	92.265	93.924	89.799	94.869	81.983	90.264	98.176	86.2	87.0518	1.94147
169	75.398	81.986	65.853	78.936	81.894	81.602	82.605	87.469	88.168	82.78	91.504	77.388	88.432	91.535	85.917	82.7645	1.73652
169.5	70.22	78.255	66.071	73.661	71.577	76.155	77.303	83.562	84.815	73.865	83.034	71.204	77.853	77.058	81.74	76.4249	1.39822
170	60.826	77.308	67.263	55.746	75.057	75.814	74.875	82.007	81.184	74.015	85.226	73.728	80.933	71.399	78.967	74.2899	2.05673
170.5	48.794	77.332	64.865	49.936	75.537	68.33	72.417	76.751	78.31	72.481	84.699	71.379	83.08	62.731	73.766	70.6939	2.70916
171	40.434	80.031	48.01	48.092	62.82	69.118	73.366	71.32	78.109	69.737	77.212	62.837	68.821	49.939	72.143	64.7993	3.21866
171.5	5.044	53.85	45.219	1.915	38.017	52.838	57.197	27.522	71.797	45.956	20.727	61.899	28.632	40.887	51.064	40.1709	5.1921
172	0.063	12.92	2.735	0.266	20.577	19.492	53.874	0.092	35.371	0.045	0.158	29.184	0.203	35.559	33.323	16.2575	4.57395
172.5	0.047	0.737	1.224	8.529	0.15	17.928	2.288	0.111	0.042	0.052	39.572	0.191	0.213	23.6	0.706	6.35933	3.02241
173	16.98	49.532	53.558	54.238	0.174	71.074	0.124	0.129	0.04	27.819	70.765	0.29	44.374	0.172	35.667	28.3291	7.10076
173.5	64.572	70.176	62.833	56.6	0.207	73.601	0.118	0.148	0.04	88.324	76.352	0.352	75.396	0.212	71.973	42.7269	9.45533
174	58.909	83.207	83.518	66.505	1.23	83.983	26.152	0.155	0.038	69.066	83.196	9.351	89.301	19.433	71.799	49.7229	9.1889
174.5	72.052	93.66	84.896	67.629	56.528	82.368	90.728	26.069	0.036	75.513	86.446	74.1	92.462	66.745	74.743	69.5983	6.63088
175	72.916	95.112	85.152	72.617	71.472	84.098	95.764	88.55	19.612	87.136	85.651	90.722	92.5	78.087	81.27	80.0439	4.76932
175.5	74.169	88.394	72.28	68.267	64.882	75.743	78.549	80.023	74.779	82.186	75.427	87.735	83.304	70.834	80.951	77.1682	1.74415
176	70.452	86.602	68.375	69.203	58.269	74.417	81.973	80.88	80.214	85.071	77.06	83.171	75.223	73.725	81.582	76.4145	1.965
176.5	84.641	83.916	70.505	79.9	72.963	75.873	83.947	83.378	81.073	86.43	76.353	84.091	82.241	74.424	81.565	80.0867	1.25653
177	86.842	93.069	85.373	81.793	77.082	80.882	89.644	89.885	88.816	74.887	80.399	87.086	88.862	79.795	76.829	84.0829	1.45163
177.5	89.508	95.838	88.099	86.475	88.157	93.001	96.079	84.702	94.637	91.931	89.656	93.355	96.507	87.964	93.568	91.2985	0.971795
178	91.439	93.59	97.049	94.28	93.84	95.174	94.718	87.061	95.149	94.462	95.107	93.578	92.084	91.271	96.291	93.6729	0.631965
178.5	91.284	84.727	77.882	95.18	91.185	91.802	79.914	87.176	94.938	92.633	93.371	83.094	80.405	95.336	88.712	88.5093	1.53796
179	91.332	87.903	72.612	96.327	87.639	89.144	77.288	85.085	88.609	90.977	90.379	77.402	75.617	96.531	85.103	86.1299	1.89131
179.5	82.42	79.675	64.722	79.226	82.51	87.278	71.643	81.17	83.198	87.076	81.376	75.72	74.693	77.902	75.678	78.9525	1.52089
180	68.489	66.81	57.744	62.609	82.786	81.717	64.275	79.588	88.876	82.187	69.267	69.37	71.649	66.199	70.251	72.1211	2.28689
180.5	74.019	79.131	64.775	72.326	85.153	88.049	73.391	80.88	90.909	83.549	76.552	75.805	80.781	75.435	79.694	78.6966	1.71847
181	64.154	79.826	65.739	69.659	77.276	85.591	74.607	79.009	87.928	83.691	75.921	70.722	80.026	77.811	82.258	76.9479	1.79886
181.5	70.854	81.971	68.149	72.744	82.567	87.885	77.143	81.79	89.014	68.515	78.616	72.528	78.801	78.164	82.803	78.1029	1.67665
182	78.139	82.8	66.062	72.643	73.923	90.558	77.943	76.391	89.634	81.246	81.447	69.383	81.696	80.266	80.239	78.8247	1.71383
182.5	49.307	77.502	63.171	52.861	38.233	87.169	74.6	61.209	84.212	63.971	78.405	57.306	71.691	74.894	78.416	67.5298	3.58797
183	18.257	62.58	39.438	45.101	39.237	71.45	67.999	47.675	62.029	59.255	53.265	50.48	50.154	62.934	63.227	52.8721	3.56339
183.5	0.092	37.778	28.154	0.914	4.197	67.113	68.155	16.951	63.352	8.21	3.244	19.217	15.291	48.521	29.951	27.4093	6.30633
184	0.066	4.579	12.729	0.16	0.373	67.282	56.777	0.062	72.097	0.048	0.258	0.248	0.026	34.815	4.659	16.9453	6.92079
184.5	0.05	0.131	0.185	0.173	0.385	77.894	64.128	0.076	81.139	0.068	0.353	0.35	0.174	45.99	0.477	18.1049	8.15401
185	0.046	0.527	0.115	0.216	0.398	0.147	13.547	0.084	63.551	0.079	30.285	0.404	32.998	8.019	0.771	10.0791	4.76598
185.5	28.123	42.991	28.894	58.169	1.293	27.673	0.123	6.574	66.355	45.978	52.725	29.504	50.692	0.154	50.343	32.6394	5.75693
186	37.936	63.407	42.176	62.43	43.698	63.984	48.022	54.298	59.139	58.544	50.772	59.373	42.333	0.203	54.729	49.4029	4.13992
186.5	33.047	67.246	46.398	56.714	49.368	71.61	73.015	64.284	53.747	55.795	54.222	48.128	49.211	0.232	56.794	51.9874	4.56557
187	39.207	79.459	48.893	64.265	69.573	69.556	76.286	64.282	71.16	57.814	67.06	48.904	56.754	0.254	60.563	58.2687	5.00326
187.5	49.669	84.439	59.291	68.515	66.333	72.344	79.722	70.708	77.77	69.13	71.666	64.142	67.3	19.436	67.32	65.8523	3.94247
188	58.974	85.731	55.04	75.794	78.922	73.966	79.528	78.724	74.405	61.651	74.722	68.553	75.401	68.512	68.907	71.922	2.15948
188.5	73.587	89.173	64.86	74.748	87.096	85.621	83.043	83.363	81.386	78.421	72.325	66.82	83.047	72.537	77.522	78.2366	1.8849
189	70.327	89.714	57.66	70.352	92.773	87.204	85.971	84.977	89.741	78.667	77.775	84.994	82.145	74.127	80.269	80.4464	2.40861
189.5	74.352	87.266	63.414	67.109	91.823	89.376	72.133	90.379	91.915	80.038	72.224	90.237	89.047	58.228	82.859	80.0267	2.92325
190	69.15	85.13	59.741	62.987	94.637	88.321	78.687	90.399	91.57	75.243	76.337	72.091	80.542	64.033	81.165	78.0022	2.81699
190.5	88.731	87.911	68.066	69.743	88.167	90.923	74.268	94.199	91.297	79.562	79.195	75.697	78.254	63.352	82.704	80.8046	2.42183
191	86.469	82.307	74.926	76.325	83.51	87.918	79.151	94.448	93.017	83.64	83.983	71.296	78.917	71.325	85.687	82.1946	1.80178
191.5	72.933	76.983	69.838	65.922	83.414	86.57	73.383	83.334	91.387	80.145	84.623	68.099	76.233	77.338	81.051	78.0835	1.86471
192	68.558	71.9	63.13	68.526	78.211	82.232	64.397	77.357	83.15	78.414	80.073	70.34	73.982	74.417	78.255	74.1961	1.607
192.5	61.745	73.801	62.535	55.132	83.68	84.357	70.598	69.119	83.353	79.316	83.757	76.356	74.023	77.415	80.182	74.3579	2.32838
193	67.467	66.764	59.539	48.819	82.995	88.126	67.197	71.226	86.475	85.162	79.217	77.611	77.355	75.306	82.588	74.3898	2.82639
193.5	69.286	67.005	58.618	48.171	79.258	89.524	66.192	73	88.115	86.321	79.007	80.668	79.349	73.289	78.482	74.419	2.90537
194	82.486	74.429	59.856	65.098	82.921	93.674	71.323	77.873	91.534	87.091	82.205	86.382	81.641	71.409	82.052	79.3316	2.43321
194.5	87.608	78.258	65.556	75.348	91.574	96.364	78.589	79.211	92.425	89.602	83.922	86.415	82.795	75.61	87.702	83.3986	2.08372
195	83.895	81.906	68.261	82.634	88.622	97.896	78.073	84.485	91.318	90.427	86.551	89.855	84.487	84.223	91.742	85.625	1.7729
195.5	78.424	88.793	80.472	75.117	87.039	91.558	75.388	87.491	88.631	89.766	90.036	93.447	77.829	87.423	91.653	85.5378	1.6204
196	74.932	90.55	86.668	86.599	89.612	93.177	79.082	75.766	94.21	72.159	88.119	93.67	81.528	86.599	89.146	85.4545	1.83776
196.5	61.806	87.662	70.369	75.362	78.512	85.09	71.787	67.014	83.593	53.617	73.311	77.426	76.345	68.209	71.25	73.4235	2.29777
197	34.553	78.515	57.792	74.69	55.101	79.774	64.018	54.86	74.285	68.269	61.659	61.704	67.074	66.87	60.581	63.983	2.93282
197.5	28.585	72.031	57.576	68.993	57.167	79.733	67.715	61.055	67.639	56.775	60.452	59.089	61.001	68.783	44.224	60.7212	3.13616
198	2.437	62.982	63.064	48.738	66.265	62.92	74.637	51.885	72.767	68.429	63.124	62.144	44.508	64.816	43.332	56.8032	4.58912
198.5	0.394	52.652	45.474	65.465	70.706	75.899	70.724	64.434	72.169	71.49	43.799	70.396	0.319	61.952	33.963	53.3224	6.39015
199	0.381	84.659	77.757	68.23	82.686	86.972	80.873	76.54	81.915	74.034	75.568	73.348	0.042	75.225	67.98	67.0807	7.14912
199.5	20.265	91.975	85.021	77.884	91.249	93.026	85.874	78.907	87.267	74.118	80.794	82.129	46.756	73.522	82.768	76.7703	4.95896
200	71.188	93.233	86.104	76.675	83.282	89.04	89.113	83.006	87.229	68.472	80.88	83.179	80.094	78.846	85.646	82.3991	1.73008
200.5	65.658	92.318	84.497	75.795	79.225	80.644	93.908	85.767	83.382	70.297	87.158	77.952	90.889	83.142	86.028	82.444	2.02277
201	81.718	91.469	89.039	80.022	83.276	82.688	93.033	90.175	87.531	78.815	88.146	84.774	94.707	80.215	89.776	86.3589	1.30964
201.5	84.674	94.293	89.145	79.433	87.323	87.566	95.015	91.935	87.686	81.917	84.84	86.577	93.309	82.982	93.054	87.9833	1.23197
202	90.557	96.803	89.413	81.003	86.216	88.733	96.47	93.178	89.504	84.45	91.651	88.445	92.366	87.049	86.959	89.5198	1.09556
202.5	78.487	94.173	82.973	80.842	86.211	89.093	90.956	87.512	92.638	86.388	83.993	87.544	86.592	84.756	86.994	86.6101	1.07659
203	81.927	95.497	91.511	82.232	87.629	87.598	94.525	95.828	92.792	88.13	86.446	91.759	92.889	87.616	87.314	89.5795	1.13275
203.5	86.611	89.57	87.276	91.059	95.361	87.867	85.882	91.667	94.791	93.447	88.255	85.488	90.365	91.84	95.443	90.3281	0.881037
204	79.176	81.016	78.694	82.784	89.39	85.666	76.371	83.766	89.111	83.364	94.777	83.024	90.619	91.813	93.692	85.5509	1.47717
204.5	78.117	80.725	73.059	78.156	85.134	82.858	74.689	81.259	86.428	82.234	95.758	78.26	84.826	81.423	89.133	82.1373	1.47653
205	70.564	56.303	62.583	62.781	76.687	78.573	52.576	75.361	86.758	79.003	82.255	74.829	76.481	59.873	80.454	71.6721	2.66628
205.5	71.052	71.532	67.354	79.225	65.57	81.63	71.704	79.629	89.513	82.599	91.182	78.08	81.13	83.087	85.751	78.6025	1.99129
206	66.641	62.403	63.178	69.564	63.986	77.694	64.456	70.54	85.652	75.775	84.522	68.191	79.595	74.266	81.433	72.5264	2.04689
206.5	67.704	65.287	58.877	50.619	69.648	74.51	62.883	61.846	83.206	75.441	72.284	64.861	78.051	57.693	83.425	68.4223	2.44875
207	84.569	70.743	64.793	61.381	59.434	79.956	72.398	74.29	88.594	67.386	80.099	74.246	80.872	78.499	83.419	74.7119	2.24582
207.5	76.276	74.095	72.956	75.118	67.964	82.706	69.097	71.704	91.334	63.922	77.498	72.416	78.592	81.288	66.179	74.743	1.81651
208	46.322	77.185	57.473	72.515	70.545	75.455	64.534	57.226	81.932	60.956	74.079	61.645	75.181	72.445	56.129	66.9081	2.57374
208.5	54.047	79.844	55.53	78.461	75.781	78.676	62.551	74.244	85.492	65.849	75.985	70.698	74.553	66.987	73.106	71.4536	2.30513
209	41.112	69.944	43.524	70.101	68.094	57.42	65.176	74.711	72.563	57.454	70.116	59.283	55.58	62.833	65.64	62.2367	2.57829
209.5	33.144	66.46	47.584	61.187	58.433	56.849	59.111	76.192	77.695	44.489	63.618	40.721	46.357	62.146	33.357	55.1562	3.57306
210	15.401	74.638	61.131	69.242	70.612	75.749	61.899	79.338	77.607	64.117	73.778	54.386	67.041	66.147	0.514	60.7733	5.85277
210.5	0.074	82.84	68.589	61.037	65.565	77.244	61.223	59.146	78.247	68.95	80.996	57.757	66.946	68.324	0.448	59.8257	6.5613
211	0.054	83.834	69.902	69.332	42.971	80.533	67.794	85.268	81.703	69.916	74.907	64.442	66.928	70.328	23.541	63.4302	6.12421
211.5	0.044	85.135	72.206	74.906	66.271	82.924	66.54	85.019	82.833	72.151	78.541	74.769	73.582	69.404	76.405	70.7153	5.29234
212	1.834	85.834	77.587	73.951	77.114	85.354	67.393	89.06	87.967	76.531	85.615	80.487	79.251	69.738	80.059	74.5183	5.44531
212.5	57.471	88.275	80.125	76.883	82.521	88.616	75.477	89.699	90.142	77.528	84.575	85.893	78.69	72.147	87.72	81.0508	2.23812
213	67.313	87.362	73.921	84.362	89.317	95.775	74.978	92.987	96.532	80.812	87.686	87.501	84.419	77.693	90.382	84.736	2.16704
213.5	73.398	88.037	74.607	83.341	88.262	93.529	79.009	91.371	96.308	83.076	84.916	79.63	84.399	77.375	84.723	84.1321	1.72124
214	80.928	91.944	69.596	80.555	86.245	91.05	79.668	95.512	94.742	81.216	83.665	81.346	83.552	74.434	81.27	83.7149	1.85955
214.5	86.441	92.024	74.046	81.979	89.776	90.498	85.546	94.524	90.234	80.336	85.369	85.452	80.61	74.044	79.581	84.6973	1.60558
215	83.3	92.461	68.045	73.636	82.125	91.393	82.263	91.856	88.477	81.864	83.7	82.117	85.261	74.101	84.519	83.0079	1.78657
215.5	84.817	90.195	72.097	78.554	79.597	86	84.909	91.317	89.141	83.866	82.556	72.157	82.435	76.473	85.46	82.6383	1.52807
216	94.591	78.724	71.233	86.235	82.037	79.872	73.36	79.573	91.641	86.112	78.878	80.017	84.863	84.143	85.475	82.4503	1.59398
216.5	87.646	75.111	67.864	80.663	81.886	79.92	66.386	72.643	85.383	81.621	78.845	69.423	83.75	80.846	85.927	78.5276	1.73934
217	88.211	78.577	67.872	78.285	81.041	81.085	66.565	73.224	84.211	84.392	81.018	74.215	84.259	80.998	89.744	79.5798	1.73357
217.5	72.228	66.968	59.849	66.106	72.57	79.603	57.336	68.631	79.666	79.196	71.301	69.059	74.814	66.88	84.284	71.2327	1.9373
218	67.636	55.116	45.936	63.256	60.319	62.091	50.417	64.227	63.074	61.251	66.334	60.094	70.293	57.221	67.886	61.0101	1.7133
218.5	48.709	52.129	0.316	56.171	54.398	25.115	45.748	48.921	0.157	35.235	63.389	49.601	61.84	0.145	50.009	39.4589	5.77818
219	65.399	61.059	10.573	60.103	76.281	42.171	61.494	64.344	16.067	57.179	89.372	67.811	69.193	0.169	70.189	54.0936	6.6131
219.5	72.729	75.603	67.261	76.995	86.919	49.975	74.405	77.31	80.225	68.727	96.449	78.083	79.218	15.131	83.192	72.1481	4.84366
220	80.434	86.158	78.993	92.023	91.034	54.34	80.721	88.275	87.706	76.88	90.358	91.866	82.853	69.25	81.572	82.1642	2.5875
220.5	83.334	88.756	76.195	95.791	91.181	57.613	82.779	91.341	84.184	77.413	90.764	94.974	80.874	76.417	71.81	82.8951	2.6126
221	54.912	61.173	52.614	73.461	59.064	34.144	40.194	69.434	39.224	55.36	51.959	66.671	47.694	58.95	43.26	53.8743	2.96482
221.5	45.923	68.592	53.887	70.121	64.226	50.647	66.856	61.267	58.013	60.77	51.437	65.279	59.295	62.702	55.631	59.6431	1.8211
222	40.795	68.394	54.365	68.899	71.891	54.524	59.692	49.52	50.109	60.849	7.072	69.586	41.415	60.653	56.707	54.2981	4.19317
222.5	33.504	69.635	63.808	74.598	72.483	57.792	65.146	51.623	46.652	61.684	0.373	71.381	8.607	65.06	56.419	53.251	5.83184
223	37.792	75.524	69.245	74.883	45.737	50.999	66.014	29.949	0.79	63.501	0.393	50.48	1.249	68.372	62.435	46.4909	6.97506
223.5	60.688	87.218	70.153	72.548	49.909	63.596	71.016	0.081	0.036	72.793	25.802	65.682	29.455	71.458	68.696	53.9421	7.03013
224	66.688	93.603	65.906	79.15	72.924	65.781	71.193	0.099	0.035	80.341	62.47	77.148	73.155	77.596	77.153	64.2161	7.00657
224.5	52.555	88.003	74.038	74.791	76.294	71.718	76.952	0.136	0.021	81.529	73.79	80.119	78.794	88.238	78.42	66.3599	7.25994
225	55.541	89.535	80.009	77.965	79.536	74.461	82.89	0.148	0.022	86.949	81.202	84.44	81.524	93.044	78.052	69.6879	7.60826
225.5	62.499	87.707	73.537	76.834	70.711	70.937	81.459	0.156	0.023	85.122	83.839	83.177	72.936	93.278	78.568	68.0522	7.39932
226	70.216	92.164	77.858	79.777	74.422	68.71	86.922	23.73	29.57	88.839	85.588	86.28	77.412	89.493	85.582	74.4375	5.33496
226.5	69.687	93.131	74.649	83.43	80.392	73.296	86.548	82.643	78.313	90.909	82.988	85.515	86.33	91.108	85.874	82.9875	1.74494
227	74.693	92.478	79.176	82.878	86.112	77.673	90.535	85.861	88.854	92.028	83.505	85.782	90.611	92.634	87.865	86.0457	1.44013
227.5	70.815	86.802	83.282	82.763	87.579	77.486	92.675	85.593	87.557	93.211	82.566	85.104	90.478	90.646	89.737	85.7529	1.52831
228	76.263	88.869	90.039	88.947	89.334	78.344	97.652	88.362	88.614	93.66	84.447	90.382	89.714	89.97	93.284	88.5254	1.40269
228.5	76.122	86.566	85.046	93.477	87.053	77.897	74.242	81.604	82.942	81.712	86.706	89.016	88.045	85.508	85.426	84.0908	1.32101
229	75.08	83.201	73.751	87.742	78.693	78.772	79.252	73.104	78.826	72.195	87.84	84.122	84.317	81.631	77.168	79.7129	1.29763
229.5	71.09	83.534	70.637	86.862	77.294	78.034	75.559	72.689	78.402	71.378	92.246	82.913	84.021	80.539	80.231	79.0286	1.61642
230	65.296	79.775	67.425	79.922	77.935	77.319	69.13	68.687	78.61	70.904	89.156	76.611	80.841	83.203	73.972	75.9191	1.70359
230.5	65.799	67.784	73.217	77.866	80.788	77.71	75.06	69.696	76.673	74.534	87.833	78.902	78.241	85.359	75.939	76.3601	1.52905
231	65.475	75.486	71.397	85.345	84.128	79.169	77.694	68.587	78.115	69.728	93.594	86.557	77.744	82.253	79.843	78.341	1.94324
231.5	66.488	80.625	72.419	91.333	85.275	82.531	79.376	71.942	80.87	67.566	93.679	88.844	78.218	85.16	79.665	80.2661	2.09076
232	75.688	82.748	73.787	83.027	74.633	81.07	78.713	79.135	82.319	72.122	92.909	90.433	81.415	80.391	82.914	80.7536	1.466
232.5	75.386	76.383	57.127	78.641	78.34	80.648	65.989	80.689	75.571	75.448	89.627	88.39	74.052	74.532	82.894	76.9145	2.06283
233	71.537	74.464	69.271	62.815	84.889	86.651	63.689	88.102	82.856	76.986	82.099	82.914	78.642	77.415	81.464	77.5863	2.03066
233.5	61.813	77.023	63.694	74.486	84.715	88.364	65.124	89.249	83.552	72.141	78.968	76.48	74.793	79.257	79.527	76.6124	2.15863
234	57.696	75.734	49.573	76.369	79.864	88.292	58.899	89.044	78.477	55.92	75.082	65.589	68.32	75.794	78.337	61.53	3.04408
234.5	59.271	78.942	32.069	75.481	79.363	88.254	61.125	83.72	77.377	54.044	75.021	65.011	63.388	75.809	70.871	51.31	3.63978
235	61.449	76.811	31.75	71.764	57.932	87.492	58.855	81.204	74.274	68.297	77.402	69.844	58.057	61.942	72.152	54.28	3.42565
235.5	62.627	76.489	38.399	71.918	77.372	90.344	67.302	88.733	84.466	75.867	79.876	74.228	71.488	72.065	81.077	74.15	3.20352
236	56.296	82.769	57.515	75.371	81.93	90.77	67.322	88.144	85.183	78.034	82.166	65.927	74.213	75.823	81.507	76.198	2.68432
236.5	68.244	90.777	65.079	77.036	83.292	88.095	76.283	90.401	89.357	83.321	86.638	75.559	77.538	85.161	85.745	81.5017	2.04517
237	70.953	94.447	64.75	75.403	81.94	85.221	85.506	92.83	92.823	86.519	83.326	81	74.015	88.427	89.969	83.1419	2.23323
237.5	72.725	94.636	68.713	78.256	88.086	85.675	83.799	94.885	96.557	93.638	86.822	86.301	81.443	90.816	94.499	86.4567	2.16188
238	75.226	94.203	61.72	76.881	85.302	87.179	91.771	95.905	94.954	94.312	86.752	84.391	86.101	91.368	94.178	86.6829	2.42061
238.5	74.559	94.242	71.975	77.786	88.123	88.071	96.167	93.943	95.625	94.676	86.376	76.487	90.41	94.519	94.301	87.8173	2.1911
239	72.174	91.076	70.383	77.95	87.841	88.403	90.978	93.981	93.821	96.697	85.31	74.769	87.734	93.375	92.128	86.4413	2.20118
239.5	78.467	82.33	71.328	77.481	86.207	86.351	85.53	93.913	91.919	95.46	80.799	78.726	88.134	86.94	88.255	84.7893	1.71003
240	77.827	84.323	69.929	79.676	84.96	89.574	89.079	90.524	89.165	93.802	81.341	80.78	87.695	80.864	89.522	84.6041	1.60942
240.5	83.894	89.59	76.951	85.235	88.437	89.492	83.282	85.895	86.344	85.243	86.244	85.05	83.043	83.259	83.617	85.0384	0.801913
241	77.657	87.697	67.926	85.44	81.963	91.835	81.351	74.585	81.133	74.668	91.076	84.837	78.755	83.302	77.871	81.3397	1.66337
241.5	75.469	84.633	67.445	84.214	80.29	88.863	79.353	69.873	79.597	77.411	93.072	83.988	79.285	82.131	83.465	80.6059	1.6962
242	77.049	82.94	69.462	83.14	80.936	86.106	69.712	72.967	79.536	79.349	90.304	82.608	83.029	82.052	85.014	80.2803	1.51608
242.5	88.025	87.785	77.224	90.727	88.236	87.875	81.088	77.56	84.134	81.312	94.953	89.363	84.888	88.217	89.2	86.0391	1.27955
243	94.355	90.45	84.984	94.606	90.579	84.804	86.527	84.961	86.469	83.679	93.972	90.38	87.755	88.982	92.216	88.9813	0.961385
243.5	88.14	90.735	82.775	96.704	94.898	88.8	89.912	87.238	85.658	81.248	97.092	90.222	83.786	88.061	91.762	89.1354	1.22333
244	87.662	90.875	86.917	96.137	95.02	92.971	88.906	86.168	85.275	82.382	98.214	96.618	83.646	87.213	90.478	89.8988	1.2783
244.5	90.089	92.168	90.771	98.568	93.669	88.539	89.461	86.64	87.888	81.862	94.508	95.198	87.411	92.399	92.611	90.7855	1.05546
245	92.518	92.31	92.054	92.793	90.834	84.12	88.575	89.013	85.171	84.346	93.995	97.335	82.562	90.153	89.868	89.7098	1.07154
245.5	77.297	82.385	70.144	86.319	86.628	81.628	74.586	78.046	75.18	76.864	76.034	83.765	59.285	76.392	68.488	76.8694	1.85214
246	45.143	35.453	27.286	63.62	46.752	41.187	53.414	51.607	32.436	46.59	16.323	55.266	27.093	57.922	34.845	42.3291	3.41956
246.5	62.994	0.069	38.934	70.38	10.242	64.642	68.872	64.779	55.54	68.071	0.018	46.651	0.082	79.864	65.09	46.4152	7.51338
247	64.396	36.61	55.503	59.952	0.173	70.807	85.172	68.329	64.93	56.194	25.573	2.271	0.134	78.191	72.852	49.4058	7.53999
247.5	71.908	71.435	58.987	69.779	15.553	70.016	85.627	54.521	70.13	56.911	75.827	0.228	26.6	86.087	72.841	59.0967	6.55232
248	75.244	86.213	64.332	73.043	62.222	75.302	85.743	74.292	74.833	56.446	84.349	33.211	75.224	86.123	55.753	70.822	3.73726
248.5	72.525	93.179	68.509	74.527	77.155	84.406	83.151	79.606	78.916	66.158	78.793	65.713	86.36	86.581	77.873	78.2301	2.03399
249	77.833	93.156	80.446	77.787	83.557	88.101	87.257	86.646	84.408	81.525	79.768	76.207	91.284	92.163	87.651	84.5193	1.41695
249.5	76.016	97.973	78.241	77.73	83.774	88.681	86.8	89.806	83.928	83.999	77.468	79.21	93.302	92.817	84.832	84.9718	1.70628
250	74.489	95.471	85.432	80.53	84.639	89.583	93.565	88.865	82.367	82.948	81.433	78.611	93.643	93.539	84.159	85.9516	1.61709
250.5	79.499	96.41	79.403	81.419	82.396	90.607	93.37	92.815	86.266	90.127	80.435	77.981	91.964	91.566	91.767	87.0683	1.61123
251	77.902	95.07	83.196	81.514	80.01	91.433	91.372	93.735	85.652	94.926	79.941	76.71	94.828	92.134	91.427	87.3233	1.76132
251.5	83.279	89.098	90.892	82.421	79.91	92.738	88.038	93.364	84.611	95.363	79.962	76.938	89.993	91.622	92.658	87.3925	1.48898
252	82.844	92.347	87.233	81.913	79.059	91.394	90.846	94.363	88.916	96.68	82.869	76.45	94.881	94.62	94.897	88.6208	1.67906
252.5	84.502	92.197	90.86	87.656	74.519	91.566	82.708	95.372	87.987	94.404	86.199	78.093	95.693	93.905	93.732	88.6262	1.65958
253	85.081	81.684	87.836	91.82	73.969	93.916	82.951	89.454	83.311	79.939	88.045	77.581	93.305	91.764	88.492	85.9432	1.53859
253.5	76.01	78.608	78.021	89.794	72.278	92.997	74.279	74.44	77.825	73.784	87.769	68.692	88.841	84.749	79.821	79.8605	1.87965
254	75.987	72.552	74.359	80.306	72.372	92.388	71.225	67.855	75.734	72.089	84.191	63.669	84.311	82.545	79.685	76.6179	1.90021
254.5	78.608	68.038	73.108	79.551	74.281	91.389	70	69.323	75.569	70.87	85.055	58.706	84.17	79.681	79.128	75.8318	2.08025
255	77.1	70.846	71.748	86.899	76.48	91.246	65.213	70.824	77.228	68.196	86.996	66.004	87.706	81.816	81.729	77.3354	2.18287
255.5	80.583	71.077	77.484	86.226	78.533	93.424	71.346	72.428	79.449	69.316	84.853	69.512	89.186	81.004	74.457	78.5919	1.91983
256	84.105	73.667	77.984	88.315	81.977	94.244	74.276	73.991	81.383	71.661	85.787	72.629	90.805	81.273	65.505	79.8401	2.06236
256.5	80.731	61.684	75.662	83.661	86.192	94.372	77.276	76.145	83.684	73.089	91.646	68.345	92.977	85.317	74.116	80.3265	2.38837
257	79.092	69.027	65.308	89.898	85.417	90.482	74.652	79.216	84.846	76.129	87.789	64.129	94.81	83.47	73.303	79.8379	2.42049
257.5	77.68	73.574	75.958	80.43	85.175	88.798	73.884	85.073	84.077	77.776	83.801	69.079	92.912	81.778	62.093	79.4725	2.03795
258	70.22	73.359	72.432	74.548	82.956	90.73	68.38	79.655	81.233	76.414	79.715	64.785	77.055	72.212	12.386	71.7387	4.55075
258.5	60.975	77.004	65.066	76.23	83.013	93.473	46.432	82.641	82.188	73.881	75.48	55.944	74.86	63.463	0.236	67.3924	5.71207
259	53.75	67.011	65.207	77.404	78.314	95.711	70.466	83.623	82.366	70.804	68.979	55.084	75.401	76.643	32.918	70.2454	3.83675
259.5	62.103	41.688	56.402	67.78	73.305	93.357	69.634	78.44	79.679	68.58	62.375	52.948	61.163	75.846	71.404	67.6469	3.20521
260	60.749	11.892	36.596	18.842	45.688	24.783	49.698	60.582	60.957	25.782	12.462	32.445	38.717	38.045	65.323	38.8374	4.652
260.5	60.903	0.033	0.258	0.21	60.862	0.055	0.141	75.241	55.811	0.067	0.036	28.275	0.235	0.586	70.71	23.5615	8.06585
261	68.139	46.233	0.175	43.146	70.146	70.322	0.087	82.054	76.827	2.983	31.174	44.465	16.851	0.234	75.532	41.8912	8.09667
261.5	73.293	84.983	45.328	77.437	77.621	89.183	53.377	87.063	91.384	73.399	74.059	64.779	76.177	50.084	85.25	73.5611	3.70495
262	77.718	92.217	64.576	80.752	82.035	89.812	90.844	91.5	92.619	91.997	76.913	73.005	86.153	89.274	89.219	84.5756	2.18177
262.5	80.739	90.669	79.414	82.873	83.711	89.323	91.198	96.448	96.016	88.432	78.231	78.104	91.062	91.65	89.456	87.1551	1.5939
263	76.624	95.558	78.033	84.112	81.393	90.856	85.568	93.324	94.054	94	77.442	78.279	91.561	93.034	91.397	87.0157	1.82667
263.5	79.564	95.21	80.678	82.583	81.826	90.866	84.877	92.117	97.278	93.612	77.775	75.158	92.04	92.087	91.16	87.1221	1.82265
264	80.087	85.678	77.145	81.326	82.338	90.969	82.86	94.334	92.841	94.281	77.186	67.519	96.059	90.205	77.43	84.6839	2.13104
264.5	81.877	89.57	82.813	84.709	82.495	90.323	81.301	93.514	88.247	90.056	79.178	71.605	94.995	89.16	78.682	85.235	1.63592
265	83.792	92.276	82.82	90.657	83.565	90.889	81.372	87.684	84.485	82.31	81.737	70.713	91.157	78.568	69.665	83.446	1.75763
265.5	78.06	85.463	78.37	90.547	79.945	90.38	76.699	75.019	78.477	75.962	87.129	73.8	88.488	74.014	61.476	79.5886	2.0087
266	79.391	86.437	72.251	85.964	78.469	92.105	76.25	73.417	76.755	76.974	88.586	72.747	88.444	78.607	60.847	79.1496	2.09187
266.5	79.963	83.452	71.531	86.89	82.257	93.173	75.675	70.726	77.705	74.856	88.85	75.116	88.096	77.398	74.166	79.9903	1.76568
267	82.932	89.267	78.74	92.403	86.501	93	77.187	77.917	81.802	77.367	93.747	80.702	90.313	84.028	81.593	84.4999	1.53443
267.5	88.36	95.245	84.306	94.582	84.702	93.369	79.452	82.321	84.695	80.504	94.802	86.138	93.764	86.208	83.032	87.432	1.42718
268	91.547	93.463	87.444	97.708	87.846	93.755	83.718	85.268	84.988	79.397	97.111	93.238	92.384	88.844	82.828	89.3026	1.39844
268.5	92.944	93.552	89.578	98.754	91.675	94.204	85.299	86.207	85.892	82.461	95.371	95.074	95.119	87.932	77.371	90.0955	1.50111
269	95.541	96.646	90.076	97.802	95.302	94.109	85.34	88.226	88.519	84.576	95.144	89.076	97.232	90.829	78.894	91.1541	1.4157
269.5	89.614	93.143	87.121	91.957	94.264	90.93	78.094	91.142	84.125	81.962	89.926	80.133	90.244	79.727	79.149	86.7687	1.45971
270	87.608	90.959	87.615	84.852	94.502	91.518	81.586	90.102	80.494	81.957	86.135	83.543	87.462	82.586	76.511	85.8287	1.24644
270.5	77.905	88.619	81.33	78.72	87.803	94.148	79.165	83.629	74.937	68.857	75.239	75.74	87.603	85.658	37.734	78.4725	3.37276
271	68.998	80.977	76.851	72.375	79.752	92.848	73.908	62.997	70.603	78.05	66.397	70.739	60.711	80.936	30.967	71.1406	3.54841
271.5	64.554	83.584	80.96	77.889	71.925	94.597	81.347	74.096	61.183	72.789	76.531	57.184	52.13	86.315	0.334	69.0279	5.71877
272	58.864	87.989	83.007	81.235	52.134	98.291	86.417	49.845	75.338	70.644	79.703	42.472	10.122	90.406	37.789	66.9504	6.29399
272.5	63.04	85.187	71.254	77.697	63.715	81.251	84.602	0.041	64.619	70.636	76.112	69.521	0.061	89.717	74.822	64.8183	7.09834
273	70.224	88.522	74.459	79.643	75.441	79.827	84.562	0.058	70.165	66.827	80.125	75.805	38.818	91.497	74.713	70.0457	5.89149
273.5	68.009	89.715	72.291	78.654	78.952	79.107	84.831	0.071	76.605	74.682	79.293	76.805	77.832	90.405	78.368	73.708	5.47096
274	72.838	90.877	77.891	80.844	80.364	81.167	89.998	0.084	84.854	86.47	80.934	83.588	81.884	95.391	79.343	77.7685	5.73549
274.5	77.533	94.251	80.519	80.623	79.099	81.798	91.203	41.336	84.396	88.079	81.488	81.627	86.781	97.057	86.31	82.14	3.26
275	74.804	92.509	72.379	79.401	82.63	83.392	93.618	84.17	86.894	87.902	80.955	76.19	88.179	95.255	89.533	84.5207	1.78953
275.5	78.47	98.23	79.948	82.919	86.576	83.257	97.354	92.28	91.838	91.913	82.832	79.667	90.624	98.739	93.389	88.5357	1.81213
276	78.599	95.866	85.288	86.892	84.489	83.988	95.565	93.202	85.79	91.289	82.119	82.483	90.028	97.867	92.253	88.3812	1.49547
276.5	83.102	90.191	85.662	85.414	84.691	84.09	95.699	95.14	88.515	93.644	83.121	82.043	90.084	95.359	92.627	88.6255	1.27781
277	83.028	90.173	91.17	91.816	85.51	83.457	92.476	95.931	88.934	94.017	85.665	82.302	90.662	96.046	95.542	89.7819	1.23424
277.5	83.837	86.933	81.072	92.725	87.011	84.159	83.292	81.314	76.239	81.277	93.273	79.094	87.907	88.414	88.438	84.999	1.24845
278	76.142	78.967	68.545	85.197	76.784	84.758	70.6	68.969	60.821	70.489	87.083	73.517	78.126	80.214	77.056	75.8179	1.8485
278.5	77.964	81.867	71.639	84.782	81.726	84.862	73.749	69.711	66.719	74.431	89.135	78.663	81.91	82.826	79.844	78.6552	1.61706
279	79.25	81.701	65.918	86.16	80.358	84.871	71.347	69.651	64.409	73.897	89.857	78.82	83.369	82.133	78.771	78.0341	1.932
279.5	87.244	82.969	70.406	86.25	86.354	84.921	71.779	71.963	71.963	73.918	89.639	77.322	88.28	79.822	82.663	80.3662	1.77885
280	86.11	83.183	70.609	86.947	87.917	83.286	74.059	74.737	67.932	73.466	92.433	79.842	86.852	75.569	78.108	80.07	1.8688
280.5	86.075	78.765	67.265	89.041	88.657	84.732	75.885	78.324	73.306	73.608	93.834	89.292	89.097	77.023	76.499	81.4269	1.99541
281	92.574	83.329	74.779	93.349	87.281	85.419	74.956	83.428	74.901	73.61	94.732	80.917	90.8	81.892	80.504	83.4981	1.84629
281.5	75.445	83.851	74.264	91.813	92.451	81.687	76.57	85.601	79.079	75.256	96.461	87.385	94.579	80.338	82.338	83.8079	1.90053
282	78.186	82.636	67.775	85.989	90.022	83.943	75.428	88.097	78.38	77.872	90.25	83.257	91.095	81.108	81.662	82.38	1.6373
282.5	78.215	84.386	71.343	84.054	88.82	85.181	73.091	89.411	80.891	78.817	88.719	91.482	91.121	83.809	82.411	83.4501	1.58901
283	55.191	69.711	54.957	74.433	65.982	74.422	61.706	79.463	64.066	65.638	63.702	75.517	81.713	79.634	63.024	68.6106	2.21835
283.5	68.122	69.878	60.808	80.969	79.869	81.336	71.423	84.52	77.01	69.226	72.225	73.271	83.691	81.998	70.009	74.957	1.79327
284	66.387	72.152	50.031	75.995	83.907	83.57	64.113	85.157	75.399	74.11	77.942	52.692	78.244	78.491	75.069	72.8839	2.71154
284.5	15.983	62.932	41.319	65.084	81.686	77.856	45.249	78.044	71.352	62.451	79.431	63.954	65.613	55.471	68.264	62.3126	4.4835
285	0.042	79.673	60.062	75.602	80.172	81.783	77.337	80.663	84.854	64.406	80.981	76.21	80.803	82.913	76.658	72.1439	5.43252
285.5	12.624	85.103	62.715	76.248	82.144	81.079	85.119	85.529	76.201	72.358	80.356	78.725	86.456	88.875	81.604	75.6757	4.80974
286	62.439	89.395	67.793	77.482	85.465	78.489	87.233	89.662	83.867	78.818	76.893	79.087	91.052	93.262	88.271	81.9472	2.25328
286.5	74.475	91.47	72.731	79.565	86.439	82.086	93.751	92.007	95.242	85.791	80.685	83.381	92.039	93.406	89.929	86.1998	1.84986
287	76.113	86.194	66.448	82.217	88.967	82.311	91.149	86.214	87.937	82.01	77.094	82.852	84.545	90.315	88.788	83.5436	1.67652
287.5	75.087	86.342	65.851	78.445	82.674	83.356	86.491	86.527	80.996	84.661	77.51	84.106	88.58	86.354	92.11	82.606	1.65424
288	78.325	90.86	65.956	83.208	84.008	83.016	82.602	87.012	83.617	86.426	80.153	84.402	86.519	90.038	89.147	83.6859	1.5527
288.5	79.756	84.875	70.727	80.006	83.6	83.754	79.074	86.813	81.315	85.667	70.374	82.154	88.367	87.074	81.529	81.6723	1.37273
289	81.419	88.957	79.808	82.287	81.966	84.934	82.529	89.657	81.576	91.477	75.936	82.128	91.056	90.455	89.539	84.9149	1.2551
289.5	85.376	92.993	78.152	93.986	83.849	83.504	83.532	91.697	81.518	88.69	79.853	87.684	92.063	92.905	91.164	87.1311	1.35211
290	80.467	89.268	70.51	86.578	81.439	83.298	76.151	74.428	70.292	76.139	87.965	86.665	88.565	85.185	82.49	81.296	1.6569
290.5	84.008	86.768	68.503	86.69	82.475	82.854	75.37	70.732	69.69	75.321	86.876	83.515	87.83	85.8	77.907	80.2893	1.75433
291	83.011	84.918	69.046	86.192	86.471	82.72	73.42	68.165	68.727	71.114	86.934	81.714	86.107	85.395	77.88	79.4543	1.88693
291.5	83.24	89.389	73.996	90.691	91.671	82.122	75.782	76.002	71.837	75.952	93.626	86.777	87.012	88.394	79.553	83.0696	1.84726
292	88.782	86.04	81.021	93.581	90.999	82.046	77.964	79.904	76.679	80.221	94.577	93.715	91.555	84.498	87.44	85.9348	1.57488
292.5	94.549	92.12	83.156	94.509	94.719	81.5	79.118	84.049	79.27	81.361	95.373	96.585	95.057	86.162	87.966	88.3663	1.7003
293	94.902	91.559	78.268	96.378	97.159	78.312	80.171	78.712	78.607	81.512	99.127	97.186	94.106	87.904	88.669	88.1715	2.10026
293.5	95.778	95.148	82.725	96.498	96.08	79.874	82.711	80.338	78.287	81.81	95.685	94.99	96.039	86.133	87.844	88.6627	1.8667
294	88.119	89.289	84.094	93.634	91.344	83.052	81.279	85.465	75.486	79.888	96.728	85.18	94.946	81.475	88.898	86.5918	1.54974
294.5	82.184	88.919	81.497	72.97	78.797	87.613	83.487	86.761	75.686	80.482	90.663	81.557	96.577	81.78	87.416	83.7593	1.55717
295	82.256	87.742	82.907	68.968	61.136	85.405	84.126	84.71	71.403	77.603	84.469	88.103	92.646	88.629	84.487	81.6393	2.18103
295.5	81.098	67.164	71.943	74.452	78.266	85.13	68.143	74.27	60.722	75.129	42.208	81.964	89.413	79.848	79.634	73.9589	2.95459
296	78.288	78.419	74.319	82.23	85.382	83.135	76.774	79.952	62.153	65.982	0.014	92.509	90.385	85.065	65.519	73.3417	5.70687
296.5	69.842	81.706	70.071	70.029	68.897	84.553	69.866	70.765	64.115	63.19	0.026	85.954	78.144	85.349	69.641	68.8099	5.28401
297	79.996	88.638	57.578	73.212	61.257	32.847	78.846	78.102	72.298	76.161	38.408	88.305	83.938	91.39	78.663	71.9759	4.50251
297.5	79.864	92.503	54.673	80.161	79.256	5.411	76.454	75.029	77.012	78.514	70.74	83.664	88.197	89.745	83.911	74.3423	5.43656
298	81.76	90.277	71.172	77.23	83.292	76.018	83.408	79.88	81.233	83.703	75.173	86.874	89.675	90.061	87.195	82.4634	1.50238
298.5	80.642	94.822	72.606	78.6	84.362	91.577	84.102	86.072	85.276	88.798	74.158	88.643	91.051	92.576	93.467	85.7835	1.76941
299	85.276	97.439	81.277	83.5	89.386	90.603	93.604	91.689	84.103	88.954	76.76	87.065	92.668	97.597	93.588	88.9006	1.53054
299.5	80.266	92.916	74.951	79.451	81.647	89.213	85.945	90.591	85.961	90.461	73.58	85.499	90.209	92.431	93.784	85.7937	1.67541
300	82.632	96.977	78.705	84.635	87.375	88.343	96.13	93.309	87.913	96.114	76.818	90.332	93.927	98.427	95.311	89.7965	1.75543
300.5	84.931	97.035	81.796	84.337	89.535	88.424	96.644	93.82	84.774	94.233	77.301	87.213	93.597	95.399	96.035	89.6716	1.58437
301	89.802	91.28	86.58	85.294	87.483	89.461	91.042	93.019	83.652	94.887	77.776	87.546	93.988	92.219	93.518	89.1698	1.18491
301.5	92.572	95.584	91.347	93.291	87.079	88.97	92.616	94.701	87.039	96.353	81.743	92.598	93.417	95.142	94.062	91.7676	1.02535
302	89.502	91.845	79.219	90.853	91.128	89.835	85.96	85.354	83.005	84.043	79.673	89.915	91.78	87.679	86.526	87.0878	1.07857
302.5	83.951	82.212	70.017	87.3	83.137	88.883	72.31	67.409	74.793	75.666	84.052	83.462	85.683	81.013	77.326	79.8143	1.68202
303	84.123	85.967	66.941	88.891	89.809	88.998	72.747	65.591	75.822	77.979	86.383	82.584	86.412	83.932	79.963	81.0761	2.00922
303.5	81.164	84.574	65.032	87.374	86.508	89.824	67.726	63.799	74.012	78.307	86.391	78.245	84.877	81.051	76.701	79.039	2.13502
304	82.176	84.105	66.126	86.926	69.885	88.929	68.054	66.064	75.496	76.697	85.131	81.828	84.53	70.792	78.425	77.6776	2.03394
304.5	88.283	84.953	67.174	86.436	83.974	89.846	70.319	69.655	74.533	75.444	84.101	83.65	84.903	75.027	80.093	79.8927	1.87964
305	89.559	87.419	68.781	85.5	86.343	89.709	73.688	74.411	76.952	77.175	86.364	86.003	85.876	78.07	77.602	81.5635	1.70329
305.5	91.584	83.328	69.098	85.909	90.741	88.747	73.305	79.295	78.682	77.001	87.902	91.73	87.074	78.785	77.087	82.6845	1.82431
306	89.431	89.337	74.824	91.418	94.363	87.763	75.532	83.063	81.05	78.123	87.203	91.516	89.479	82.008	80.807	85.0611	1.58659
306.5	71.375	86.949	77.025	87.306	93.715	88.569	73.395	87.547	81.876	73.756	79.046	91.807	87.702	83.744	82.839	83.1101	1.78105
307	76.824	84.486	72.267	85.794	92.525	89.471	75.582	84.797	80.518	66.282	80.905	90.939	82.839	83.968	84.734	82.1287	1.82556
307.5	78.276	84.111	76.776	85.616	96.157	91.643	62.397	82.264	82.686	71.9	80.868	92.438	85.419	82.807	86.534	82.6595	2.15532
308	50.817	63.587	59.562	64.143	80.078	89.51	40.77	79.987	70.836	60.482	54.625	65.342	67.487	58.836	63.827	64.6593	3.14665
308.5	4.513	0.105	51.122	1.834	58.297	90.926	57.723	65.32	54.382	61.87	6.536	6.963	59.755	12.496	3.183	35.6683	7.99759
309	0.042	30.241	21.442	0.064	0.385	91.864	66.368	22.735	71.102	66.507	0.028	0.22	75.638	0.342	0.258	29.8157	8.89097
309.5	0.025	69.653	0.093	56.37	0.429	93.923	74.78	0.118	83.984	79.451	29.885	43.236	83.698	0.423	0.397	41.0977	9.81776
310	0.191	87.827	30.774	78.825	30.087	91.661	75.309	0.13	86.961	81.429	69.027	82.091	85.369	10.969	66.525	58.4783	8.75243
310.5	56.171	90.985	54.251	82.964	77.407	87.594	81.314	0.143	88.839	87.178	71.348	89.868	87.667	73.801	90.64	74.678	6.12994
311	73.328	84.38	60.818	80.364	82.58	85.384	88.709	38.009	87.971	91.224	73.16	90.168	86.985	86.383	85.307	79.6513	3.62667
311.5	77.038	86.98	70.823	82.939	86.901	88.181	89.52	76.978	93.985	92.747	75.311	92.112	89.944	89.76	89.113	85.4888	1.84739
312	82.796	90.684	71.787	85.357	88.102	89.124	84.359	68.044	95.562	95.584	72.887	92.035	92.801	91.178	90.912	86.0808	2.24952
312.5	80.96	92.013	70.722	87.824	89.258	87.815	81.359	69.691	92.735	89.99	73.094	88.681	88.821	90.107	90.626	84.9131	2.02751
313	88.181	88.236	74.01	86.401	90.725	88.279	78.365	87.359	90.895	92.954	72.044	90.91	91.999	86.785	90.861	86.5336	1.67403
313.5	88.243	86.595	76.567	85.565	87.23	86.905	75.402	90.293	87.151	85.42	72.663	90.766	92.097	88.707	90.856	85.6307	1.53673
314	91.956	88.401	77.869	94.901	91.745	88.47	82.665	89.794	84.496	88.227	78.052	95.815	94.317	91.499	90.783	88.5993	1.44563
314.5	88.374	86.156	71.042	89.435	90.312	88.555	77.36	76.08	76.719	76.587	84.64	88.756	89.914	85.155	80.657	83.3161	1.63314
315	88.849	85.772	72.628	90.684	87.083	90.229	77.679	72.384	78.471	74.675	83.267	85.87	90.37	85.78	82.357	83.0732	1.66041
315.5	91.063	84.605	70.529	90.069	88.951	90.713	76.185	68.341	77.192	75.832	85.432	86.475	89.793	82.478	79.962	82.508	1.93272
316	93.953	87.156	75.8	92.737	91.634	90.522	77.866	75.653	80.301	81.045	88.837	90.144	90.794	85.833	83.483	85.7172	1.61809
316.5	91.466	89.745	83.392	94.051	91.711	91.606	77.738	79.84	80.816	84.713	93.962	93.888	92.57	89.249	86.329	88.0717	1.42989
317	96.305	90.641	83.946	96.625	95.237	89.223	83.008	83.888	82.255	83.336	97.104	97.682	93.097	86.586	87.67	89.7735	1.50358
317.5	80.923	94	77.771	98.253	90.989	90.792	81.251	81.639	81.769	81.525	98.492	97.454	93.193	86.993	85.892	88.0624	1.84024
318	87.387	96.907	82.188	97.171	90.117	88.28	79.929	80.566	80.526	80.784	95.613	94.539	91.352	88.327	85.29	87.9317	1.61809
318.5	93.951	94.213	87.584	93.642	91.403	88.364	81.717	84.414	82.798	83.065	92.142	98.062	94.418	86.634	90.914	89.5547	1.3005
319	79.216	88.53	84.378	86.847	91.663	87.77	82.449	87.42	83.894	83.573	83.625	85.135	93.86	86.048	88.572	86.1987	0.95149
319.5	78.242	86.247	87.625	86.029	84.89	89.385	83.308	89.545	79.683	81.373	82.456	90.746	88.091	86.097	81.344	85.0041	0.983127
320	81.722	81.288	81.976	82.195	84.407	91.504	83.068	83.319	62.375	80.225	75.877	88.85	90.201	81.819	74.279	81.5403	1.8206
320.5	74.771	82.149	79.436	92.078	88.425	93.921	82.068	84.66	75.214	78.29	80.73	92.228	81.575	85.341	81.427	83.4875	1.53594
321	75.532	86.841	83.435	88.374	86.053	93.692	71.461	87.114	42.294	68.573	77.312	85.409	72.43	89.186	83.323	79.4019	3.2605
321.5	76.597	84.976	71.921	90.412	87.451	90.107	25.807	81.774	0.049	75.13	78.403	85.356	17.844	81.043	80.74	68.5073	7.44459
322	82.781	86.028	81.756	92.97	91.403	96.579	0.074	85.235	0.034	79.32	77.781	85.246	0.182	89.834	76.812	68.4023	9.23851
322.5	78.95	89.884	83.134	92.724	93.042	94.623	0.042	86.967	0.031	78.991	83.243	80.748	0.212	90.301	85.922	69.2543	9.32959
323	74.701	92.049	77.997	87.891	85.687	92.391	4.3	89.309	0.024	86.462	80.844	81.515	53.111	90.092	90.802	72.4783	7.8
323.5	81.911	95.146	83.192	91.686	90.388	95.003	73.023	92.06	0.02	90.187	84.702	87.003	85.058	93.698	90.66	82.2491	6.06694
324	78.566	95.326	78.652	87.52	89.498	94.102	82.936	91.017	13.695	91.617	82.064	84.293	89.606	95.515	92.484	83.1261	5.16888
324.5	77.003	97.735	81.413	91.299	91.554	95.141	89.405	93.065	75.471	95.084	81.564	81.105	92.305	95.617	96.146	88.9271	1.93633
325	80.959	95.59	88.046	95.738	92.912	95.899	93.552	95.333	94.811	95.773	83.533	86.742	95.05	93.79	93.503	92.0821	1.25373
325.5	86.586	90.83	91.566	94.566	92.815	94.795	92.889	94.505	92.732	95.317	82.703	88.108	96.003	95.645	94.13	92.2127	0.97415
326	91.475	88.273	90.18	93.786	89.333	96.79	89.625	95.149	87.062	88.986	82.457	93.589	95.396	96.282	93.674	91.4705	1.02773
326.5	90.704	87.522	81.535	93.643	88.31	94.058	86.004	90.489	82.986	84.663	89.553	91.809	94.382	89.348	89.784	88.986	1.00593
327	82.55	81.658	80.002	88.004	84.102	84.836	80.356	73.692	79.566	75.446	88.636	81.807	86.35	83.24	79.86	82.007	1.07491
327.5	84.915	84.05	77.89	87.775	80.691	73.161	77.524	70.579	76.55	73.047	88.136	79.319	85.199	84.064	80.537	80.2291	1.41008
328	78.158	80.865	73.024	86.236	78.478	82.033	75.676	68.236	75.356	66.71	85.28	78.89	82.566	82.506	79.288	78.2201	1.46122
328.5	76.714	75.047	70.233	88.123	84.662	89.81	69.742	66.571	73.682	72.906	85.642	79.66	82.802	78.14	79.305	78.2026	1.80708
329	78.586	79.036	70.446	87.373	76.598	87.62	72.133	67.502	75.001	71.465	86.21	78.015	84.708	79.658	80.719	78.338	1.63008
329.5	84.014	83.31	75.149	90.967	87.191	92.976	76.911	76.923	77.639	74.843	89.814	80.487	85.245	82.817	83.478	82.7843	1.49595
330	90.242	80.013	73.533	87.978	91.426	94.399	77.445	76.444	77.614	75.096	91.439	81.443	84.211	80.644	82.554	82.9654	1.72222
330.5	84.371	78.686	71.953	83.333	86.033	92.533	74.721	75.13	77.684	73.758	87.13	79.278	85.451	84.005	80.356	80.9615	1.49515
331	68.37	72.828	69.189	80.264	82.285	88.83	70.868	70.631	73.687	71.834	77.394	75.87	80.64	81.312	77.373	76.0917	1.49331
331.5	62.496	61.451	61.799	79.625	73.386	15.51	74.5	68.638	72.723	69.724	73.931	71.67	78.308	72.781	74.928	67.4313	3.97602
332	68.281	72.406	70.144	83.946	83.716	0.1	80.443	79.389	80.24	76.842	78.278	71.526	77.79	68.454	71.739	70.8863	5.23334
332.5	67.513	67.6	62.317	78.496	82.178	0.259	71.246	74.113	79.611	73.389	69.009	66.421	70.591	36.433	75.15	64.9551	5.37332
333	68.204	48.078	64.801	86.277	82.313	53.598	68.358	73.22	79.249	68.464	66.472	74.261	77.671	0.375	72.324	65.5777	5.32134
333.5	59.587	21.275	57.198	80.465	83.043	84.341	67.071	74.927	74.415	69.841	61.22	67.231	73.131	0.444	72.153	63.0895	5.93818
334	54.341	0.048	35.103	64.619	55.538	90.318	62.459	53.259	65.888	47.665	15.391	48.277	60.8	39.816	63.296	50.4545	5.61648
334.5	72.194	8.292	42.507	85.392	64.301	95.082	67.128	81.049	81.297	46.899	0.044	73.448	77.886	79.737	69.882	63.0092	7.10075
335	78.612	66.266	47.342	88.362	82.967	90.545	78.071	87.426	86.21	73.561	29.09	79.924	82.09	82.079	80.706	75.5501	4.30388
335.5	81.175	87.723	63.382	91.688	86.579	93.563	81.896	90.042	87.88	80.807	72.038	79.612	82.622	85.419	73.882	82.5539	2.07891
336	82.661	84.141	69.116	90.351	84.365	93.432	82.945	90.874	89.094	80.482	76.29	83.857	81.474	85.432	81.087	83.7067	1.56534
336.5	84.296	88.272	69.332	85.213	90.402	93.828	82.893	92.284	91.745	76.338	78.442	80.598	86.845	89.698	83.464	84.91	1.73475
337	83.759	85.489	74.076	92.16	91.944	94.575	84.414	91.507	90.849	81.122	79.468	84.723	87.841	94.624	83.308	86.6573	1.53878
337.5	85.925	88.26	75.205	92.036	89.594	95.214	85.495	87.371	83.568	85.179	78.804	82.096	90.384	89.825	58.356	84.4875	2.28386
338	75.448	84.186	78.5	90.092	85.434	94.964	82.436	84.153	72.327	81.526	73.937	79.631	91.808	86.776	64.018	81.6824	2.08781
338.5	82.388	86.498	79.528	92.47	89.392	95.212	84.45	84.667	73.35	82.815	80.07	85.403	90.82	88.411	80.014	85.0325	1.47053
339	79.499	81.807	68.946	88.035	85.973	89.146	75.366	74.334	74.731	73.444	84.32	82.125	83.727	81.081	79.426	80.1307	1.49956
339.5	78.342	79.494	68.253	86.628	90.097	92.741	66.251	65.178	72.765	72.354	73.845	77.796	82.327	77.858	79.47	77.5599	2.1072
340	75.703	76.812	72.765	84.313	90.8	94.687	65.329	60.259	72.75	73.607	83.809	72.492	82.647	78.64	77.826	77.4959	2.31013
340.5	78.919	72.343	73.632	88.388	90.822	96.279	64.247	63.304	74.855	77.196	90.082	79.63	86.051	74.731	80.875	79.4236	2.46501
341	83.045	74.781	77.141	90.037	94.266	93.959	69.626	67.503	73.648	78.311	93.417	83.342	85.905	76.692	82.753	81.6284	2.24202
341.5	93.024	79.923	79.094	94.411	96.507	94.634	76.601	75.171	77.399	77.99	95.054	87.268	86.534	81.992	85.793	85.4263	1.98618
342	89.022	78.015	76.141	86.66	95.178	93.234	76.573	74.802	78.923	74.248	96.968	85.592	82.715	82.378	86.043	83.7661	1.9261
342.5	89.27	77.186	66.316	85.103	90.036	96.006	65.851	72.459	77.271	72.137	90.693	81.729	82.146	75.566	84.131	80.3933	2.3368
343	83.239	71.513	58.279	83.311	84.585	93.409	59.631	72.11	72.077	67.939	85.099	77.695	80.017	71.459	80.843	76.0804	2.51284
343.5	76.122	68.923	29.962	69.105	27.295	72.025	34.059	67.039	43.801	14.219	75.766	69.992	68.067	69.583	78.144	57.6068	5.50685
344	69.909	59.629	0.087	14.25	0.315	0.064	0.261	55.123	9.02	0.033	76.53	19.681	14.061	65.14	78.843	30.8631	8.27487
344.5	48.81	65.231	8.881	8.449	0.259	10.192	2.489	10.048	0.471	6.382	75.25	8.075	4.553	63.645	66.43	25.2777	7.45384
345	69.04	79.245	51.712	68.574	3.878	70.459	62.26	0.069	0.472	83.069	32.376	66.266	59.963	50.239	57.834	50.3637	7.24911
345.5	52.728	81.904	53.546	82.87	60.496	88.669	79.664	0.097	1.106	94.823	0.045	88.156	87.897	38.496	3.451	54.2632	9.4888
346	26.705	78.239	67.866	81.364	62.15	92.146	76.508	0.094	1.343	91.894	28.821	72.583	86.611	61.363	4.551	55.4825	8.70839
346.5	0.04	84.611	80.41	84.31	73.125	90.976	80.668	0.091	9.492	92.729	69.258	82.51	85.399	84.253	65.319	65.5461	8.55552
347	37.479	87.766	83.594	83.464	82.5	89.789	88.131	0.116	70.356	88.805	74.42	90.521	86.742	88.465	82.915	75.6709	6.39931
347.5	73.06	78.73	73.946	77.973	77.104	85.237	86.629	57.798	89.251	88.337	71.901	87.588	88.958	88.567	86.767	80.7897	2.32128
348	85.051	86.199	79.689	86.536	83.381	85.701	89.875	88.129	92.508	85.205	75.41	90.911	92.067	93.546	85.829	86.6691	1.26089
348.5	84.264	90.893	77.128	82.536	80.44	86.215	89.004	90.438	92.936	92.579	73.405	87.934	85.207	92.951	88.565	86.2997	1.52017
349	85.678	95.803	82.119	83.64	83.177	85.579	94.587	92.078	94.293	94.922	74.496	87.742	87.831	94.961	93.737	88.7095	1.62246
349.5	93.383	95.242	83.348	89.736	87.057	85.925	93.103	94.066	95.136	92.964	76.92	91.004	89.979	94.848	94.089	90.4533	1.34354
350	89.908	92.126	88.831	89.112	87.598	86.675	89.724	93.557	90.309	92.322	76.903	91.107	94.774	91.898	93.749	89.9062	1.10151
350.5	88.878	92.109	86.865	90.05	87.792	86.429	92.263	95.868	85.531	91.518	77.439	92.675	93.161	93.421	95.104	89.9402	1.21032
351	91.51	91.785	73.043	87.019	84.59	87.481	84.281	85.891	84.384	84.057	83.051	85.96	91.64	87.1	88.874	86.0444	1.1877
351.5	82.386	83.131	66.95	80.327	73.386	82.685	70.555	66.862	76.391	71.829	77.667	80.231	83.853	76.427	79.743	76.8282	1.48121
352	81.5	79.184	65.443	74.359	75.632	88.208	69.798	64.172	77.553	71.541	70.802	77.974	84.311	77.38	78.86	75.7811	1.70952
352.5	74.635	71.143	64.014	73.475	74.77	87.794	64.807	59.569	75.877	72.84	76.978	73.681	81.477	71.65	74.243	73.1302	1.76766
353	76.472	74.497	65.854	73.033	67.389	72.072	66.468	65.302	75.097	74.975	81.45	80.425	79.828	72.042	75.495	73.3599	1.35626
353.5	77.212	73.439	72.534	78.71	73.881	83.636	64.548	65.967	75.266	79.181	87.528	86.001	84.088	72.485	76.238	76.7143	1.73992
354	76.093	74.943	76.694	79.248	78.323	85.944	63.765	63.599	75.575	76.379	85.356	84.136	80.132	72.476	75.696	76.5573	1.68875
354.5	86.618	80.61	75.366	83.019	84.911	86.46	72.897	69.171	79.042	74.473	88.466	91.366	79.913	77.3	76.255	80.3911	1.63253
355	81.684	82.91	74.333	80.72	82.723	86.073	71.129	70.332	78.143	70.062	81.238	90.795	80.448	76.26	80.762	79.1741	1.52005
355.5	63.374	81.049	65.838	72.58	82.408	86.463	71.966	75.725	73.077	71.347	58.767	86.529	76.017	66.443	72.651	73.6156	2.09541
356	60.423	75.882	60.651	75.416	79.478	85.131	65.564	70.529	61.495	57.481	59.564	61.195	29.084	63.445	63.475	64.5875	3.32203
356.5	16.944	26.116	19.481	37.845	39.222	48.605	23.753	19.725	12.07	32.906	8.919	31.472	0.442	20.36	31.613	24.6315	3.27104
357	0.492	0.037	0.204	0.022	0.088	0.062	0.352	0.115	0.117	0.035	0.236	0.134	0.595	0.245	0.402	0.209067	0.0459211
357.5	7.538	21.161	22.431	33.407	3.372	14.496	23.108	0.111	0.376	0.027	8.311	38.77	41.129	4.493	11.443	15.3449	3.62686
358	45.376	50.967	37.709	67.133	50.796	66.128	61.862	0.108	0.394	2.057	15.528	65.881	69.208	40.83	41.441	41.0279	6.50136
358.5	63.337	63.465	40.459	67.473	49.044	83.199	67.163	0.119	0.723	56.314	31.457	75.189	75.133	62.609	52.749	52.5622	6.46877
359	74.653	78.599	56.075	73.611	59.09	85.814	71.945	0.128	31.2	72.124	59.018	84.203	80.669	81.573	66.169	64.9914	5.88621
359.5	73	82.392	60.58	77.109	77.637	78.239	77.438	52.075	67.587	69.26	63.56	83.808	83.088	86.27	73.342	73.6923	2.47449
360	76.302	90.277	63.316	82.062	81.621	83.608	83.031	77.774	74.26	76.838	66.218	83.753	85.431	84.267	76.461	79.0146	1.85719
360.5	78.593	90.821	64.543	87.251	83.782	85.016	85.169	84.095	74.872	83.577	70.326	84.044	88.162	88.377	71.938	81.3711	1.97139
361	82.246	93.812	66.027	83.714	81.322	85.179	85.556	84.611	79.437	87.596	72.075	86.666	87.295	89.335	80.302	83.0115	1.76638
361.5	85.886	97.143	72.418	86.633	84.214	85.385	91.867	88.108	84.038	87.556	73.818	84.613	94.186	94.475	86.329	86.4446	1.75127
362	89.87	95.615	76.401	89.352	88.575	84.5	89.881	89.059	83.443	93.318	72.56	87.646	93.528	96.099	88.178	87.8683	1.68831
362.5	84.856	90.567	84.695	85.36	89.63	85.718	83.607	90.196	80.82	92.817	73.501	84.859	96.982	91.428	90.262	87.0199	1.4546
363	91.425	93.869	88.257	90.164	86.713	84.774	86.719	88.298	84.114	91.819	79.174	91.609	95.445	92.991	90.448	89.0546	1.10189
363.5	82.726	86.874	76.622	86.068	87.286	82.914	79.157	78.235	81.581	79.622	84.122	88.21	85.955	80.261	83.8	82.8955	0.924697
364	80.513	82.84	73.321	82.188	85.791	83.628	75.252	72.741	79.517	76.899	84.503	89.567	83.561	79.256	81.241	80.7212	1.21162
364.5	81.427	80.643	67.366	79.278	86.084	83.479	69.366	65.956	76.846	71.574	80.25	81.972	79.052	76.853	79.729	77.325	1.55909
365	82.379	78.084	71.219	80.476	76.827	76.217	70.695	71.568	79.065	77.545	82.048	86.585	85.366	77.673	81.847	78.5063	1.24849
365.5	85.458	83.267	76.637	83.963	85.701	85.623	72.589	72.735	79.575	79.473	89.075	91.904	87.531	80.143	79.338	82.2008	1.46115
366	90.101	84.226	80.815	91.071	91.128	86.734	73.594	75.249	80.481	80.595	94.673	89.373	82.38	80.023	83.267	84.2473	1.58172
366.5	96.702	85.276	78.623	93.764	93.57	87.542	77.504	77.968	83.028	79.944	97.352	94.137	90.074	83.68	85.789	86.9969	1.7913
367	87.121	91.517	79.17	98.315	97.065	85.063	81.254	81.787	84.485	79.589	98.028	94.71	89.926	87.124	88.262	88.2277	1.69716
367.5	82.737	89.482	83.592	94.279	93.859	88.257	82.536	85.104	82.765	79.799	86.57	92.46	93.428	84.433	84.517	86.9212	1.22445
368	80.856	80.305	75.007	93.234	81.776	91.781	81.995	86.632	80.249	76.339	88.058	87.914	93.926	84.555	78.922	84.1033	1.53549
368.5	70.488	78.729	73.898	80.188	73.298	95.24	79.808	82.213	61.033	80.251	72.555	83.305	89.261	86.966	79.832	79.1377	2.13898
369	64.054	72.694	69.954	75.803	75.853	93.171	76.334	72.138	36.268	74.132	70.67	70.79	81.589	73.831	67.426	71.6471	3.05742
369.5	65.189	73.944	69.838	79.508	77.129	93.488	69.734	63.821	38.463	66.868	65.562	74.232	85.773	75.542	56.119	70.3473	3.29665
370	64.805	69.027	64.807	71.973	72.004	85.566	64.163	53.92	42.715	73.021	63.593	72.737	76.703	66.833	44.979	65.7897	2.93988
370.5	54.891	60.445	39.505	73.456	64.213	84.219	30.985	38.25	51.336	73.762	25.754	75.211	61.998	38.449	0.792	51.5511	5.82218
371	59.272	44.116	25.381	66.789	65.837	90.313	76.071	62.967	57.985	78.633	0.026	77.968	17.782	5.472	0.339	48.5967	7.97406
371.5	72.108	69.154	46.34	75.065	79.059	53.598	76.09	71.371	71.761	87.282	0.06	76.69	0.067	0.378	3.023	52.1364	8.63436
372	75.213	82.816	59.924	75.736	78.787	72.499	79.345	79.388	75.894	89.715	35.221	82.918	30.503	0.582	70.089	65.9087	6.36674
372.5	75.031	83.199	65.772	75.58	75.676	77.659	77.969	86.192	81.18	90.524	63.811	80.876	76.251	61.197	90.694	77.4407	2.27016
373	78.306	91.055	71.531	83.81	79.452	86.225	84.198	87.346	83.268	94.876	74.494	88.03	88.866	93.768	93.496	85.2481	1.80727
373.5	73.568	80.324	65.579	70.853	76.416	79.54	80.288	84.012	82.021	94.581	72.585	80.467	89.445	88.147	93.259	80.739	2.13522
374	75.311	84.353	69.492	74.75	77.015	77.142	90.27	86.109	84.348	93.689	73.921	80.081	91.662	87.033	90.439	82.3743	1.94192
374.5	77.74	87.043	72.448	80.659	80.888	84.401	86.789	85.951	84.056	94.143	75.866	76.588	94.42	88.777	89.815	83.9723	1.69547
375	78.337	81.842	71.104	78.907	77.776	81.199	82.347	81.702	72.275	93.775	71.488	70.633	91.628	80.254	87.192	80.0306	1.82299
375.5	81.603	80.294	75.158	84.591	75.94	87.296	77.077	85.129	76.038	89.982	74.627	76.908	86.475	85.9	88.73	81.7165	1.40452
376	69.707	73.718	61.566	70.903	76.002	92.561	70.075	65.087	72.428	75.407	76.61	69.804	82.109	77.547	82.109	74.3755	1.94804
376.5	72.463	74.281	60.747	63.408	59.315	79.862	73.77	57.072	72.553	75.831	78.338	76.586	80.191	79.192	82.296	72.3937	2.13056
377	72.053	77.53	60.336	68.245	69.096	78.256	70.202	56.795	71.78	72.807	77.328	70.927	81.098	79.917	77.711	72.2721	1.78609
377.5	75.122	79.078	60.962	72.148	70.974	78.847	73.653	59.614	76.332	75.895	79.465	74.052	82.34	78.191	79.821	74.4329	1.68648
378	73.102	77.882	65.873	77.154	76.519	83.221	69.641	58.881	78.019	78.894	81.944	81.232	76.532	77.326	81.731	75.8634	1.70643
378.5	83.085	79.987	70.713	83.986	77.78	83.672	76.898	64.087	78.505	72.346	88.266	86.614	80.792	81.278	81.644	79.3102	1.63827
379	82.76	84.986	72.447	87.571	81.795	87.243	77.077	73.676	83.586	77.968	91.739	79.364	82.341	85.123	82.865	82.0361	1.35227
379.5	84.891	91.523	76.825	85.204	89.897	85.767	77.062	75.797	89.424	78.902	89.699	87.528	88.93	88.864	85.166	85.0319	1.37551
380	93.219	90.636	86.505	92.95	92.418	84.839	77.766	88.02	92.187	81.814	93.985	95.199	89.765	91.666	86.183	89.1435	1.27028
380.5	84.97	84.476	68.105	85.938	92.249	90.14	74.59	93.58	94.103	88.529	88.515	81.489	88.983	86.862	88.412	86.0627	1.80156
381	78.176	71.866	55.334	76.451	89.381	90.184	76.334	92.175	88.296	80.665	85.252	69.287	89.824	84.788	83.353	80.7577	2.56122
381.5	78.366	78.244	68.869	79.56	88.562	92.965	78.778	92.394	86.274	86.111	83.991	80.495	89.499	89.704	84.467	83.8853	1.68629
382	72.227	80.213	59.241	80.468	80.757	93.927	76.193	81.273	71.099	62.263	83.258	76.682	81.188	88.062	75.228	77.4719	2.30014
382.5	75.464	64.484	64.888	77.243	77.758	91.497	79.809	76.371	77.333	58.638	82.138	79.596	83.393	80.661	79.232	76.567	2.12877
383	77.56	77.959	68.681	77.482	78.996	91.007	79.745	81.778	79.145	69.422	83.804	83.04	88.218	89.449	82.462	80.5832	1.63894
383.5	78.051	72.631	74.786	83.473	83.658	91.692	84.616	84.697	78.52	76.493	85.384	77.519	89.761	92.892	83.691	82.5243	1.57353
384	81.622	88.061	75.378	85.288	82.817	91.877	91.721	87.051	83.225	77.562	81.951	82.863	89.736	96.494	89.186	85.6555	1.46846
384.5	76.806	88.458	68.11	84.528	82.557	89.438	91.276	83.895	78.651	77.21	77.992	82.335	92.362	89.602	88.876	83.4731	1.75052
385	74.572	84.777	61.656	80.102	79.792	76.258	90.633	75.373	67.333	84.138	71.088	80.183	92.341	82.052	79.918	78.6811	2.09849
385.5	83.801	90.616	70.153	84.15	83.932	82.516	94.381	84.753	80.594	88.955	77.341	85.841	94.342	91.37	85.21	85.197	1.6493
386	76.817	89.002	73.414	84.381	83.522	90.473	94.479	87.38	81.859	90.084	76.518	80.728	96.919	93.556	90.553	85.979	1.8295
386.5	74.61	81.012	72.445	79.856	80.913	91.833	85.553	85.271	78.575	84.094	65.764	74.992	91.181	86.801	88.832	81.4488	1.89104
387	85.256	83.61	88.687	84.917	83.951	93.716	89.506	92.257	85.438	89.577	73.531	83.487	94.815	91.658	89.985	87.3594	1.38464
387.5	81.985	87.329	87.14	85.438	79.613	95.063	87.287	87.731	72.225	86.101	74.639	84.917	87.751	94.197	87.434	85.2567	1.59032
388	82.236	90.197	70.496	83.496	82.802	90.17	84.309	78.201	76.879	83.642	81.856	85.404	81.319	88.974	89.273	83.2836	1.3918
388.5	87.825	90.257	70.861	84.346	82.022	82.336	81.852	75.255	81.848	80.718	85.917	84.872	88.84	87.271	86.949	83.4113	1.33053
389	82.72	81.918	68.452	74.044	77.509	70.86	74.687	65.023	75.492	77.766	83.489	80.673	83.763	80.684	81.838	77.2612	1.48904
389.5	82.606	81.285	68.013	80.947	81.721	87.054	64.401	65.163	77.713	81.124	76.78	80.275	90.398	80.662	84.761	78.8602	1.94922
390	70.135	74.656	58.379	81.329	83.48	87.798	59.751	58.454	70.857	73.401	80.592	71.41	91.386	75.328	83.364	74.688	2.6575
390.5	84.48	82.864	72.257	93.643	89.584	87.233	69.283	70.931	77.42	84.33	91.839	91.877	92.886	82.166	87.754	83.9031	2.09831
391	93.771	89.466	85.81	96.595	94.028	88.173	75.83	79.909	82.801	88.186	97.52	95.592	95.542	85.577	91.366	89.3444	1.671
391.5	94.245	94.763	84.779	92.815	98.541	85.675	79.873	83.679	89.022	79.783	99.048	96.125	93.235	87.4	94.049	90.2021	1.64431
392	76.173	87.069	84.67	86.651	92.23	84.348	84.465	86.59	86.137	81.811	94.769	81.524	92.567	87.358	90.487	86.4566	1.23563
392.5	84.17	85.318	85.427	85.09	85.221	86.835	82.182	87.185	79.045	72.215	88.662	84.625	89.867	82.184	68.474	83.1	1.51211
393	85.369	87.955	84.886	93.266	84.48	87.63	80.341	83.505	70.526	70.859	78.084	87.963	93.942	87.066	72.79	83.2441	1.90423
393.5	77.649	81.413	75.449	86.856	82.616	86.806	74.712	76.327	74.071	75.74	55.357	74.239	85.333	66.308	49.979	74.857	2.74646
394	75.355	81.919	74.953	83.792	80.729	86.45	75.561	72.092	67.975	67.625	7.274	81.598	81.142	62.759	51.388	70.0408	5.07481
394.5	77.986	51.437	68.519	67.384	78.393	88.219	70.083	71.371	60.399	62.555	0.062	78.567	84.497	61.209	39.947	64.0419	5.60277
395	16.973	0.084	40.948	3.566	66.905	71.356	33.821	49.891	34.788	26.282	0.138	23.945	73.303	27.315	44.814	34.2753	6.23303
395.5	37.084	9.694	43.767	0.067	70.196	10.308	69.991	75.651	66.673	66.966	43.659	0.134	73.51	47.697	62.409	45.1871	7.17857
396	66.239	59.368	3.237	0.097	80.215	0.109	78.967	84.309	75.605	83.874	68.709	0.179	82.085	71.745	70.498	55.0157	8.89813
396.5	77.981	72.523	1.759	63.129	81.096	27.007	84.947	85.073	83.453	87.552	76.518	11.935	82.726	79.959	80.952	66.4407	7.33237
397	80.088	80.636	45.976	83.215	78.317	79.726	84.607	82.18	86.214	88.566	77.419	70.802	84.605	78.927	88.429	79.3138	2.66088
397.5	82.871	85.408	71.241	88.667	80.292	84.724	88.89	83.821	86.722	91.943	80.184	88.569	88.602	86.982	90.182	85.2732	1.33801
398	82.321	90.86	77.471	86.399	79.786	84.835	91.224	84.375	87.035	91.225	78.536	91.546	88.637	91.281	86.508	86.1359	1.25285
398.5	81.625	88.612	76.082	87.103	80.016	85.387	90.518	83.917	89.524	90.666	75.845	84.855	88.988	89.998	86.442	85.3052	1.27797
399	74.42	87.263	67.812	87.324	79.368	86.683	92.292	83.461	83.803	87.985	73.767	75.98	85.365	84.16	72.678	81.4907	1.81765
399.5	80.295	84.773	74.84	85.771	78.468	87.171	88.396	86.654	83.634	73.603	75.218	83.719	83.037	85.94	72.36	81.5919	1.3922
400	88.201	80.961	74.752	87.528	75.722	87.685	86.051	84.308	82.011	71.145	78.377	86.578	80.387	78.137	64.479	80.4215	1.76628
400.5	85.88	78.696	70.506	83.329	79.46	88.534	81.086	77.964	81.764	66.317	83.912	83.595	77.695	68.454	66.546	78.2492	1.83635
401	81.974	78.211	66.66	72.811	67.435	88.605	73.95	70.661	80.823	60.923	82.518	82.89	72.568	56.643	65.537	73.4806	2.33422
401.5	81.721	79.729	64.945	72.842	62.614	90.492	72.299	68.42	79.869	60.722	84.419	81.493	69.668	65.112	66.71	73.4037	2.3222
402	85.449	81.4	70.647	79.848	75.177	89.563	74.702	73.733	82.328	67.242	89.268	84.12	77.784	64.492	70.568	77.7547	1.98928
402.5	86.659	81.978	71.98	83.585	80.426	88.287	76.685	76.792	84.789	72.891	91.884	86.134	79.871	69.624	74.377	80.3975	1.69708
403	94.366	83.327	76.358	88.407	82.205	87.282	75.53	78.066	86.921	71.181	92.865	87.832	79.872	75.626	76.301	82.4093	1.80118
403.5	90.205	85.066	76.468	87.718	84.626	88.669	75.595	81.499	87.969	68.983	91.409	90.714	83.279	73.643	71.047	82.4593	1.94015
404	90.508	86.209	74.63	90.97	88.117	91.83	75.749	84.562	89.987	63.489	92.002	82.976	86.449	73.113	71.457	82.8032	2.3014
404.5	88.824	87.681	82.488	89.221	89.132	91.22	81.734	92.299	91.805	69.888	91.448	87.12	88.09	76.52	73.585	85.4037	1.82014
405	84.296	85.477	84.048	90.425	90.528	90.497	75.848	92.519	87.077	82.924	85.406	86.201	85.12	82.798	73.297	85.0974	1.35232
405.5	84.802	81.341	74.219	86.883	88.078	91.136	76.004	94.021	86.089	74.375	84.509	88.623	87.131	79.529	70.318	83.1372	1.7836
406	79.783	81.15	78.735	89.693	89.16	90.177	79.706	95.625	91.281	78.666	85.323	91.368	77.333	81.859	69.341	83.9467	1.83326
406.5	86.352	80.72	83.348	87.437	87.303	89.373	80.603	91.322	86.348	77.49	85.524	93.254	83.755	76.297	75.345	84.2981	1.38406
407	92.924	81.009	76.13	84.97	77.533	91.248	79.072	92.445	90.302	67.074	84.225	93.356	75.284	80.387	65.52	82.0986	2.32124
407.5	91.194	79.266	74.175	83.459	77.064	88.829	74.963	91.928	89.561	67.5	82.926	95.049	72.338	81.525	68.676	81.2302	2.26276
408	94.993	77.931	80.303	87.121	81.58	90.145	75.786	93.491	89.081	77.326	84.885	93.657	79.129	89.628	72.844	84.5267	1.85466
408.5	92.549	85.749	79.664	88.556	83.129	89.974	83.327	93.264	95.842	82.568	82.591	88.802	84.08	88.764	79.967	86.5884	1.28029
409	86.84	87.942	71.945	88.193	84.993	86.405	86.592	82.438	92.376	78.128	73.808	88.112	87.526	88.909	80.735	84.3295	1.50147
409.5	78.568	89.272	66.812	85.961	79.132	84.503	84.469	80.003	82.572	81.376	70.466	84.16	81.483	84.284	82.466	81.0351	1.48925
410	85.56	94.069	72.35	89.752	83.839	86.255	91.692	83.951	84.56	84.736	73.653	86.925	89.38	88.584	87.645	85.5301	1.51423
410.5	82.942	92.438	71.614	88.301	81.583	89.139	94.847	84.415	78.2	91.372	75.582	81.183	90.422	90.886	88.772	85.4464	1.74731
411	83.575	90.193	78.967	88.795	85.348	89.465	95.278	84.359	83.086	91.968	77.543	80.432	92.406	89.367	91.342	86.8083	1.37959
411.5	87.169	91.705	86.15	86.596	80.446	90.162	87.735	86.867	86.316	94.878	76.269	85.336	94.601	90.255	89.777	87.6175	1.24858
412	85.485	87.208	87.93	89.156	79.5	90.439	84.044	86.985	85.026	93.423	78.089	88.078	93.178	85.993	90.289	86.9882	1.11352
412.5	93.722	88.733	90.481	92.573	81.878	88.836	88.841	89.042	86.076	92.497	83.472	87.313	90.001	91.803	92.16	89.1619	0.874888
413	90.482	92.884	83.401	90.1	86.81	88.545	81.355	85.884	84.984	86.166	86.207	85.598	88.215	86.265	86.884	86.9187	0.737202
413.5	83.011	90.582	78.677	87.076	84.988	85.933	75.316	86.099	84.157	80.608	90.077	87.626	84.343	74.759	84.217	83.8313	1.22157
414	84.613	92.071	77.732	85.665	80.497	88.577	75.656	84.134	81.723	70.068	86.086	86.18	82.49	74.603	81.874	82.1313	1.48251
414.5	90.836	93.854	82.51	90.933	85.026	86.296	75.277	86.283	86.506	75.667	89.377	88.568	88.11	77.754	85.851	85.5232	1.4339
415	84.37	93.386	86.071	90.755	87.742	87.296	79.786	88.836	87.277	83.584	89.661	91.804	90.124	85.161	82.015	87.1912	0.971156
415.5	92.081	95.574	85.35	95.432	89.939	87.405	80.502	92.798	83.768	82.89	90.266	93.186	92.322	86.125	79.771	88.4939	1.34861
416	90.729	93.176	89.396	97.238	97.234	84.879	82.738	95.989	84.318	87.328	88.316	95.696	95.708	85.338	86.207	90.286	1.33222
416.5	84.206	95.815	95.281	95.387	92.768	76.531	86.314	97.71	73.822	91.005	91.612	91.775	91.903	84.964	93.988	89.5387	1.82128
417	88.622	98.307	95.912	96.788	92.155	79.516	86.035	91.293	72.193	93.683	83.158	91.919	90.784	90.949	90.155	89.4313	1.77512
417.5	86.564	88.836	93.097	74.558	87.977	85.312	83.873	84.684	71.997	81.727	78.968	90.17	93.567	90.332	83.669	85.0221	1.61626
418	59.67	84.717	64.347	69.761	83.406	84.789	81.811	69.515	63.524	59.92	63.406	64.416	82.462	87.771	74.885	72.96	2.65046
418.5	58.316	86.055	21.032	78.102	82.244	84.256	78.765	72.788	53.674	77.075	55.762	62.922	31.596	89.839	75.283	67.1806	5.18334
419	72.974	88.12	0.065	84.809	84.26	83.981	82.271	75.203	59.399	82.099	62.271	79.979	0.1	86.293	76.927	67.9167	7.42464
419.5	77.664	82.245	0.119	82.227	76.691	85.759	79.426	65.443	61.667	84.656	61.723	83.375	0.14	85.451	85.385	67.4647	7.37929
420	74.919	83.339	0.144	88.983	79.692	82.605	78.934	48.484	58.414	80.904	48.464	73.79	39.599	57.517	81.997	65.1857	6.11225
420.5	79.739	84.857	0.166	86.522	82.283	84.468	77.041	69.668	73.977	86.96	54.473	79.445	88.1	78.005	89.562	74.3511	5.77324
421	81.5	88.255	22.236	83.532	84.917	85.324	82.455	81.186	79.263	93.043	66.534	82.419	96.409	89.679	91.095	80.5231	4.5352
421.5	81.437	93.784	95.845	80.245	84.863	82.266	87.883	85.727	78.951	91.561	71.709	78.057	94.93	95.666	91.628	86.3035	1.92937
422	78.62	89.934	94.86	73.104	81.693	81.863	90.168	83.26	83.621	94.284	72.425	75.505	93.211	90.82	92.778	85.0764	2.01468
422.5	76.053	88.193	95.829	72.816	75.372	76.626	91.13	84.954	75.571	91.727	65.375	66.942	93.393	85.26	74.017	80.8839	2.52488
423	70.3	87.33	96.949	62.038	73.934	74.771	82.754	82.415	74.389	89.767	62.77	58.681	85.689	85.61	83.904	78.0867	2.87659
423.5	74.341	87.294	98.991	71.19	75.527	72.964	83.859	79.72	73.181	85.792	61.729	56.913	82.858	86.675	84.153	78.3458	2.74625
424	71.947	87.913	99.316	72.223	74.503	72.768	83.827	77.346	76.265	92.07	56.998	61.29	88.371	89.445	84.188	79.2313	2.98569
424.5	71.007	81.663	98.77	66.972	72.378	76.408	60.615	77.538	74.33	87.822	51.503	54.835	90.247	85.666	74.115	74.9246	3.3683
425	74.435	65.255	96.789	59.645	49.445	74.574	55.869	78.658	70.108	80.164	54.353	53.212	88.583	85.383	78.112	70.9723	3.68311
425.5	81.09	81.582	96.437	71.682	67.691	77.373	77.283	73.13	70.01	79.678	68.755	56.471	83.609	87.505	80.709	76.867	2.44816
426	84.651	83.844	96.713	65.544	78.068	80.816	78.186	69.15	76.133	81.377	78.78	60.795	83.359	85.55	82.851	79.0545	2.26158
426.5	85.004	81.32	96.911	60.021	76.12	83.612	73.77	72.419	76.566	76.883	64.726	61.74	82.626	86.412	81.647	77.3185	2.55175
427	85.031	80.959	96.979	58.654	74.615	74.15	57.355	65.419	77.776	75.183	63.769	61.633	78.942	78.819	79.767	73.9367	2.79358
427.5	86.787	81.319	97.483	62.071	80.205	79.714	56.334	72.388	80.532	78.637	61.651	64.535	83.502	82.017	83.853	76.7352	2.88043
428	87.592	83.39	96.492	70.789	80.074	83.017	67.231	75.257	81.69	79.021	73.139	59.401	84.405	75.319	85.96	78.8518	2.34305
428.5	82.477	75.164	95.418	62.885	83.137	81.788	69.628	77.267	83.701	81.899	83.267	65.208	84.92	77.066	84.591	79.2277	2.16022
429	92.918	81.044	96.479	75.401	88.208	79.793	69.051	80.873	87.185	75.96	85.78	76.462	88.093	79.755	73.243	82.0163	1.96739
429.5	87.551	82.353	98.144	88.161	92.928	80.025	74.606	87.536	73.746	81.031	85.85	76.384	85.923	84.958	79.168	83.8909	1.73496
430	80.491	79.272	97.603	74.107	85.054	82.999	69.288	92.408	83.309	81.102	76.117	67.746	86.774	85.974	76.707	81.2634	2.06384
430.5	89.748	82.637	97.772	78.265	86.068	82.463	64.266	94.319	91.949	85.226	82.286	74.983	90.741	84.444	81.674	84.4561	2.1346
431	74.055	84.185	97.686	79.708	81.197	82.97	68.835	91.052	82.757	77.761	82.908	47.615	91.188	87.426	84.48	80.9215	2.99229
431.5	70.72	74.357	97.404	74.322	83.867	83.199	68.045	92.078	76.611	75.854	72.235	60.166	87.901	88.002	78.993	78.9169	2.5442
432	81.067	81.461	95.517	80.523	88.924	81.076	76.228	95.093	92.892	86.12	79.371	75.593	87.559	90.684	80.405	84.8342	1.70647

## Sheet: RowData 1.2 DD
Table Row Data 1.2: Individual and mean hourly valve opening amplitudes (VOA, %) during the 7 days of free-running experiment under constant darkness in laboratory (18/03/2014, 00h00 – 24/03/2014, 00h00). Individual valve amplitude behavior was recorded every 1.6 second by valvometrey HFNI and average per hour.
Continuous time (h)	Oyster1	Oyster2	Oyster3	Oyster4	Oyster5	Oyster6	Oyster7	Oyster8	Oyster9	Oyster10	Oyster11	Oyster12	Oyster13	Oyster14	Mean group (n=14)	Standard Error group (n=14)
1	38.135	88.83	87.625	68.456	0.722	82.607	72.61	67.922	85.989	0.744	86.382	5.857	84.925	85.371	61.1554	9.2139
2	26.277	90.592	87.487	73.347	76.245	36.642	83.035	66.156	89.596	0.746	83.117	82.358	85.108	83.665	68.8836	7.37221
3	72.874	82.278	42.22	91.256	82.699	28.51	91.185	5.49	90.379	27.614	57.771	87.875	88.238	80.72	66.3649	7.71009
4	83.095	13.063	12.258	92.456	83.575	81.856	91.267	72.445	39.501	71.123	1.028	85.58	87.616	33.798	60.6186	8.88106
5	84.748	2.335	76.616	66.437	43.504	90.178	93.024	17.087	0.508	83.381	0.882	62.381	72.429	0.047	49.5398	9.99279
6	86.797	64.718	89.296	79.827	0.561	66.865	88.419	7.393	0.413	81.99	27.084	0.727	38.983	40.369	48.103	9.55707
7	87.785	93.196	93.05	82.258	72.219	3.189	22.478	74.224	0.363	78.073	78.243	0.59	0.598	86.775	55.2172	10.5141
8	91.424	95.706	96.777	66.098	94.442	74.016	23.673	26.995	0.306	72.084	87.839	0.49	0.632	91.952	58.7453	10.481
9	81.927	86.833	92.659	1.293	89.724	79.558	76.535	0.559	0.222	36.371	82.428	7.086	0.612	86.829	51.6169	10.8648
10	28.496	69.999	70.626	39.501	75.381	73.332	75.087	50.297	5.991	0.253	88.736	75.569	0.577	92.332	53.2984	8.72794
11	22.156	71.48	82.704	68.278	82.801	67.783	80.459	61.018	74.789	0.307	87.147	90.554	0.634	86.54	62.6179	8.36438
12	82.269	81.514	90.421	76.358	71.909	2.792	89.039	63.657	88.712	0.287	56.745	93.913	2.973	88.403	63.4994	9.33535
13	89.52	79.165	92.827	81.16	5.227	18.399	87.865	83.712	96.962	0.284	0.24	93.847	77.666	91.542	64.1726	10.3631
14	93.054	92.402	87.775	82.731	0.248	75.445	90.928	64.506	88.296	24.671	0.307	95.905	70.14	86.103	68.0365	9.07766
15	92.756	88.354	88.069	72.322	0.226	75.264	87.303	40.093	87.963	70.728	56.101	83.988	77.493	70.65	70.8079	6.64484
16	88.414	10.649	22.547	72.086	67.636	15.6	46.26	0.241	85.292	67.26	81.53	90.353	88.334	0.06	52.5901	9.45941
17	38.374	0.712	0.254	82.033	90.891	8.518	0.241	58.34	83.249	79.013	83.963	92.496	91.9	0.184	50.7263	10.7775
18	0.053	59.464	66.275	86.539	95.622	80.645	53.149	43.122	29.844	56.299	82.519	46.726	88.756	71.641	61.4753	6.99407
19	57.778	88.13	86.01	60.445	86.946	88.348	84.888	0.164	0.26	7.034	86.664	0.443	85.218	88.13	58.6041	10.2803
20	90.345	85.36	92.026	0.554	63.92	93.302	93.489	0.16	0.229	0.441	89.004	0.455	10.557	95.083	51.0661	11.9557
21	95.736	77.928	93.235	0.817	0.116	93.281	97.361	58.675	0.237	0.47	90.5	0.493	0.67	96.43	50.4249	12.2805
22	97.234	1.284	92.412	0.876	0.09	46.412	97.055	22.137	0.224	0.464	92.828	59.459	0.73	94.126	43.2379	11.6968
23	94.858	0.25	96.969	50.096	0.071	0.161	95.852	0.072	0.203	13.352	93.626	87.382	43.46	94.573	47.9232	11.8038
24	86.652	64.854	86.161	76.155	11.299	0.113	74.542	0.055	0.199	59.068	90.109	93.434	85.296	97.646	58.9702	10.2405
25	6.664	91.46	2.709	76.125	78.835	0.677	1.075	2.012	31.236	26.732	94.516	95.385	87.376	91.012	48.9867	11.1128
26	30.176	83.985	38.543	84.092	82.924	54.905	8.691	71.935	82.199	0.816	18.938	91.086	87.472	90.861	59.0445	8.82504
27	75.978	8.234	74.277	86.695	79.976	64.442	71.455	35.664	92.202	0.8	1.14	91.108	84.188	81.875	60.5739	9.08642
28	85.367	1.149	87.453	89.667	90.758	66.293	78.588	0.486	83.297	0.791	29.779	93.64	87.553	84.478	62.8071	9.93253
29	88.755	1.112	90.512	84.627	42.823	74.828	91.748	0.474	86.783	0.79	80.166	91.833	84.704	86.017	64.6551	9.81288
30	90.612	50.267	90.749	82.452	0.334	68.698	95.922	0.46	90.519	0.792	88.204	78.704	6.053	92.475	59.7315	10.6127
31	90.65	63.868	87.593	86.507	0.303	78.626	97.352	0.439	50.917	0.791	91.195	0.92	0.863	91.259	52.9488	11.2664
32	90.146	56.991	91.034	84.202	0.295	86.336	94.077	0.434	0.501	47.516	90.701	0.765	0.913	93.2	52.6508	11.3435
33	88.248	0.975	81.332	34.843	0.266	75.463	76.9	0.394	0.443	57.639	90.212	0.75	0.95	87.772	42.5848	10.7427
34	89.565	0.913	91.116	26.703	0.257	77.35	48.417	0.383	0.45	68.44	90.946	43.216	36.313	93.153	47.6587	10.0508
35	91.782	0.761	95.388	62.203	0.221	7.598	0.427	0.333	0.436	69.548	80.656	73.777	65.073	88.391	45.471	10.8276
36	88.896	25.549	96.952	76.157	0.196	0.294	2.109	0.302	0.394	84.651	2.391	91.359	78.582	88.998	45.4879	11.58
37	7.314	65.311	95.766	86.227	0.174	0.257	66.25	0.271	0.249	82.349	14.524	96.983	92.037	85.987	49.5499	11.2914
38	0.056	76.745	21.098	93.461	0.143	46.375	82.857	0.233	34.745	59.548	75.137	91.973	88.998	44.196	51.1118	9.44731
39	60.747	63.593	0.05	90.599	0.14	55.25	91.763	0.228	79.015	11.926	85.019	80.095	60.451	0.062	48.4956	9.99269
40	87.812	2.924	50.184	91.613	0.132	0.179	93.559	0.21	65.821	0.477	94.424	5.515	0.585	64.07	39.8218	11.1354
41	88.924	0.377	81.104	85.13	0.114	0.138	89.112	0.185	57.139	0.481	95.715	0.325	0.676	88.749	42.0121	11.7826
42	91.827	0.323	90.573	69.175	0.09	0.099	91.716	0.166	62.086	0.414	87.987	42.551	0.65	91.073	44.9093	11.3144
43	93.863	0.321	91.397	36.523	0.108	0.128	68.264	0.171	86.448	0.371	25.919	75.981	0.655	92.194	40.8816	11.0389
44	91.688	23.972	89.328	0.431	0.097	0.102	0.321	0.16	78.841	0.306	0.284	87.229	0.65	89.543	33.068	11.3621
45	92.427	65.103	96.68	0.45	0.097	39.012	0.239	0.152	33.594	0.304	0.278	86.921	0.732	91.569	36.2541	11.0739
46	90.653	74.323	96.02	40.155	0.073	82.117	60.282	0.122	0.121	0.326	53.641	81.204	61.559	88.91	52.1076	9.97375
47	56.319	75.274	91.43	73.657	0.071	89.103	22.695	0.123	0.092	50.656	86.149	55.8	58.105	87.978	53.3894	9.19533
48	0.049	20.514	95.292	81.483	0.048	92.871	64.465	0.088	0.098	64.446	95.417	0.642	0.45	84.744	42.9005	11.3861
49	0.083	1.049	89.987	92.169	42.006	94.037	87.872	0.289	0	47.182	91.157	0.738	0.547	21.633	40.6249	11.198
50	70.051	0.936	22.078	91.668	86.538	88.329	96.56	0.264	0	0.334	91.366	70.675	0.57	0.048	44.2441	11.567
51	86.134	0.866	0.168	91.491	83.598	37.356	93.573	0.247	0	0.41	90.06	62.304	0.638	20.541	40.5276	11.0818
52	86.653	0.829	40.479	73.744	93.354	0.446	93.078	0.234	0	0.403	87.053	2.177	9.136	82.659	40.7318	11.2993
53	89.663	31.151	80.964	26.873	81.985	0.398	90.877	0.21	0	0.388	21.348	0.817	84.656	88.245	42.6839	10.7854
54	87.086	68.786	89.724	67.742	77.778	0.394	88.982	0.208	0	0.418	0.303	0.898	93.782	85.127	47.2306	11.4198
55	84.438	16.746	89.912	78.158	60.914	0.351	86.248	0.182	0	0.409	33.335	44.525	10.154	89.485	42.4898	10.1314
56	23.261	0.62	92.453	90.532	1.223	7.788	91.573	0.185	0	0.395	81.477	54.064	0.552	91.256	38.2414	11.2779
57	0.045	0.571	84.094	77.3	0.139	63.586	83.465	17.28	0	0.434	91.09	82.096	0.628	80.605	41.5238	10.9322
58	49.744	0.467	85.787	16.324	0.109	84.85	53.824	60.957	0	0.415	90.273	95.591	0.671	87.995	44.7862	10.7064
59	83.396	0.488	90.969	46.225	0.11	88.98	0.324	67.344	0	0.41	86.518	93.958	0.719	88.586	46.2876	11.48
60	91.753	0.372	89.866	71.911	0.085	93.577	25.594	78.188	0	0.454	24.725	91.012	0.79	87.896	46.8731	11.2545
61	95.927	49.637	91.215	87.022	0.068	95.79	72.64	72.555	0	0.453	1.001	93.913	2.007	89.404	53.688	11.4209
62	95.931	87.42	82.137	93.557	0.072	93.544	85.449	72.619	0	0.443	0.993	94.925	80.745	87.11	62.4961	11.0217
63	89.163	77.097	7.606	87.812	22.947	57.733	87.294	62.574	0	28.246	36.05	86.023	66.298	68.918	55.5544	8.285
64	87.616	64.102	0.048	86.794	76.819	0.174	88.52	42.093	0	75.998	71.131	6.728	0.53	0.178	42.9094	10.4649
65	87.154	47.486	45.151	84.523	83.25	0.162	91.365	0.082	0	74.806	38.173	0.289	0.596	2.678	39.6939	10.3015
66	88.031	2.71	72.819	25.787	86.906	0.122	90.42	47.015	0	40.687	1.255	15.439	0.637	78.765	39.3281	9.97502
67	50.697	0.219	82.361	60.473	87.72	0.164	91.624	87.386	0	0.51	1.434	70.916	0.739	94.564	44.9148	11.1109
68	0.078	0.264	89.089	82.055	86.328	0.178	95.29	90.344	0	0.502	18.743	16.571	0.744	92.181	40.8834	11.7409
69	0.114	0.301	92.479	91.635	58.212	0.2	91.506	74.387	0	23.825	73.255	3.108	0.777	87.041	42.6314	11.0744
70	73.693	0.233	95.263	78.761	0.298	20.657	87.905	85.167	0	66.631	85.412	5.902	0.822	87.338	49.1487	10.9184
71	94.278	0.205	95.735	90.116	0.057	73.627	91.138	67.93	0	17.38	92.575	69.896	0.832	88.982	55.9108	11.1009
72	95.515	0.193	95.684	95.847	0.046	94.415	91.01	5.617	0	0.463	89.979	88.201	0.902	89.744	53.4011	12.5578
73	94.966	0.817	96.204	94.47	0.208	91.25	71.57	0.263	0.12	0.171	88.29	92.946	27.914	89.805	53.4996	11.919
74	97.026	0.76	92.662	97.592	11.06	94.559	0.691	0.247	0.125	0.185	43.03	90.697	77.829	52.08	47.0388	11.5928
75	94.218	58.142	87.84	96.939	73.978	96.721	39.963	0.221	0.15	0.218	0.272	95.317	59.059	0.119	50.2255	11.2544
76	90.326	81.327	22.742	93.016	85.019	91.805	18.087	0.207	13.057	0.213	0.301	96.612	12.602	65.147	47.8901	10.9255
77	87.351	78.254	0.048	28.642	93.758	88.696	0.195	0.197	79.213	0.168	52.226	84.682	1.292	83.897	48.4728	10.8817
78	92.165	81.167	50.41	2.131	83.501	94.299	21.453	0.191	77.901	0.22	80.404	90.234	1.333	93.547	54.9254	10.7791
79	94.436	42.977	81.242	62.381	76.033	92.345	73.057	0.183	70.283	0.24	90.636	86.073	1.355	95.406	61.9034	9.64245
80	56.804	0.584	91.52	42.02	76.758	62.621	85.204	0.177	67.866	0.234	87.297	44.649	1.367	94.271	50.8123	9.77892
81	0.048	0.527	85.672	26.403	40.832	0.2	80.543	0.168	74.702	0.213	26.059	0.327	1.387	92.732	30.7009	9.90523
82	17.214	0.493	94.253	63.875	0.155	0.194	90.092	0.16	77.374	0.173	0.336	0.243	1.401	87.847	30.9864	10.9043
83	81.049	0.432	94.34	68.008	0.133	0.175	88.765	0.141	83.847	0.143	0.32	43.883	1.411	81.369	38.8583	11.0972
84	91.461	0.439	96.433	72.263	0.129	0.17	94.873	0.143	76.711	0.204	0.424	20.536	1.462	15.005	33.5895	11.1498
85	95.49	0.375	92.558	84.09	0.114	0.868	95.736	0.122	88.029	0.234	45.447	2.086	1.491	22.872	37.8223	11.5406
86	95.834	0.326	85.803	86.749	0.101	66.606	92.389	55.842	93.785	0.243	71.754	2.088	1.509	83.453	52.6059	11.0777
87	96.893	0.334	83.537	89.214	0.099	74.658	88.431	77.04	72.976	0.227	21.431	5.817	1.49	93.346	50.3924	11.1528
88	83.541	0.77	12.426	43.015	0.098	85.014	5.929	63.684	2.411	0.262	0.49	56.676	1.517	94.383	32.1583	9.93195
89	85.058	62.478	0.082	0.366	0.098	92.92	2.926	19.416	0.373	0.296	0.594	3.436	1.548	95.041	26.0451	10.4063
90	78.891	82.302	59.494	0.462	0.079	88.591	67.034	59.514	0.355	0.264	52.777	3.184	27.845	95.747	44.0385	9.94715
91	2.608	60.528	80.778	0.512	0.091	80.817	9.203	79.878	0.355	0.253	77.507	3.223	64.269	90.138	39.2971	10.4424
92	0.105	1.147	86.981	11.093	0.095	85.825	0.099	21.175	0.368	0.268	89.211	3.268	88.44	42.08	30.7254	10.4434
93	11.583	0.358	89.595	56.398	0.1	90.835	6.602	0.138	0.373	0.281	96.545	24.248	71.36	0.067	32.0345	10.5537
94	77.321	0.281	88.76	63.076	0.091	75.501	62.155	0.118	0.373	0.287	92.819	40.944	17.046	17.659	38.3165	9.87266
95	86.585	0.171	88.248	79.443	0.063	76.279	86.177	0.078	0.37	43.685	70.853	4.928	0.803	81.03	44.1938	10.7461
96	90.296	0.16	88.12	85.171	0.057	12.733	93.396	0.072	0.372	78.798	0.572	7.946	0.838	91.636	39.2976	11.7454
97	93.128	0.475	37.466	90.54	0.129	0.276	90.418	0	0.109	76.58	0.577	50.99	0.755	92.113	38.1111	11.2576
98	93.082	0.447	0.126	95.001	0.117	0.251	90.22	0	0.113	75.427	0.602	9.48	0.788	91.501	32.6539	11.7328
99	91.682	0.456	0.141	93.184	0.116	9.318	85.926	0	0.129	66.427	57.35	7.886	0.822	86.591	35.7163	10.9851
100	87.543	0.384	64.645	91.504	13.148	67.56	82.533	0	0.141	24.466	82.218	22.181	0.847	89.427	44.7569	10.3692
101	81.085	0.353	85.663	90.582	76.222	76.837	12.12	0	0.15	0.41	90.836	58.169	0.891	73.118	46.174	10.7704
102	3.509	0.369	93.703	91.315	85.536	84.999	0.339	0	0.164	0.461	92.008	74.318	0.909	2.309	37.8528	11.8618
103	40.943	0.307	90.821	53.363	92.722	82.83	49.669	0	0.175	0.489	85.075	86.822	0.941	0.427	41.756	10.7583
104	84.31	0.299	90.669	32.989	94.171	89.835	15.174	0	0.152	0.461	8.99	83.325	0.923	29.562	37.9186	10.8323
105	91.331	0.324	37.668	59.731	96.009	88.017	37.16	0	0.266	0.625	0.817	84.078	1.058	81.887	41.3551	10.8707
106	96.045	0.254	0.088	21.918	79.988	94.421	46.478	0	0.224	0.568	0.726	86.714	1.001	91.362	37.1276	11.4231
107	97.613	0.24	0.097	4.589	12.436	47.875	0.926	0	0.161	0.47	0.577	87.292	0.934	92.88	24.7207	10.4011
108	97.5	0.261	45.612	57.415	0.097	0.16	0.109	0	0.139	0.438	53.63	91.116	0.917	94.306	31.55	10.747
109	96.92	12.856	91.877	62.615	0.078	0.138	21.757	0	0.126	0.417	74.95	93.439	0.9	93.263	39.2383	11.4562
110	92.645	74.138	96.084	69.035	0.069	0.13	66.333	0	0.124	0.408	43.474	95.017	0.91	94.254	45.1872	11.41
111	79.131	79.74	98.145	68.384	0.074	11.377	88.705	0	0.124	0.407	0.281	91.412	0.913	92.774	43.6762	11.7634
112	1.081	76.628	92.295	84.002	0.065	65.358	93.646	0	0.119	0.396	0.274	87.484	0.921	96.237	42.7504	11.9105
113	21.054	54.747	64.275	82.742	0.058	40.79	89.161	0	0.123	0.406	0.297	87.083	0.956	93.93	38.2587	10.4689
114	79.861	49.232	0.053	56.863	0.049	0.115	90.605	0	47.987	0.414	0.312	63.924	1.001	88.983	34.2428	9.98256
115	91.239	13.788	0.07	0.552	0.063	0.137	94.295	0	84.928	0.434	51.071	0.407	54.31	82.418	33.8366	10.7267
116	93.708	48.053	44.724	27.646	0.056	0.116	94.412	0	84.415	0.433	79.573	0.284	86.776	10.181	40.7412	10.6447
117	92.882	82.576	79.592	56.743	0.059	0.125	89.692	0	90.517	0.452	90.517	0.257	72.628	0.052	46.8637	11.4738
118	91.591	92.183	91.046	76.095	0.055	15.438	89.109	0	92.837	0.463	92.172	49.424	7.394	42.155	52.8544	10.8496
119	92.72	93.848	96.1	87.243	0.046	76.514	86.908	0	80.543	0.484	85.421	22.615	0.532	83.104	57.577	11.1061
120	87.651	81.866	96.354	89.091	0.046	89.199	48.277	0	22.341	0.487	29.981	45.679	0.57	87.787	48.5235	10.5146
121	76.08	91.428	96.691	94.252	0.12	86.181	0.445	15.663	0.109	76.58	0.577	50.99	0.755	92.113	48.7131	11.4309
122	0.067	63.204	87.894	93.891	0.113	90.703	0.426	57.557	0.113	75.427	0.602	9.48	0.788	91.501	40.8404	11.2115
123	0.05	3.369	89.31	95.022	0.114	94.955	40.08	65.942	0.129	66.427	57.35	7.886	0.822	86.591	43.4319	10.7012
124	61.997	0.486	91.096	93.236	0.105	95.06	54.148	77.579	0.141	24.466	82.218	22.181	0.847	89.427	49.4991	10.5789
125	85.524	0.404	55.735	89.269	0.092	88.293	26.309	59.732	0.15	0.41	90.836	58.169	0.891	73.118	44.9237	10.264
126	92.693	0.471	0.056	72.071	0.097	35.628	0.201	23.257	0.164	0.461	92.008	74.318	0.909	2.309	28.1888	10.0732
127	95.807	0.429	13.264	15.765	0.091	0.124	0.172	0.065	0.175	0.489	85.075	86.822	0.941	0.427	21.4033	9.9359
128	94.063	0.376	76.514	47.657	0.089	0.107	46.569	58.127	0.152	0.461	8.99	83.325	0.923	29.562	31.9225	9.42094
129	92.735	0.317	88.61	63.391	0.079	0.092	40.593	66.738	0.266	0.625	0.817	84.078	1.058	81.887	37.2347	10.726
130	95.626	0.269	89.458	77.771	0.074	0.076	52.283	76.466	0.224	0.568	0.726	86.714	1.001	91.362	40.9013	11.5367
131	91.083	0.254	86.52	61.104	0.064	24.183	2.396	83.941	0.161	0.47	0.577	87.292	0.934	92.88	37.9899	11.2892
132	88.456	0.35	63.341	2.787	0.076	75.164	0.127	86.988	0.139	0.438	53.63	91.116	0.917	94.306	39.8454	11.2188
133	94.286	0.346	0.079	0.593	57.24	90.058	0.116	62.201	0.126	0.417	74.95	93.439	0.9	93.263	40.5724	11.5187
134	81.826	0.302	0.082	24.858	78.796	93.171	41.579	61.23	0.124	0.408	43.474	95.017	0.91	94.254	44.0022	10.5813
135	0.53	0.26	32.7	45.53	89.071	83.394	63.914	20.345	0.124	0.407	0.281	91.412	0.913	92.774	37.2611	10.4977
136	0.134	0.339	11.809	56.038	92.298	87.769	91.814	0.055	0.119	0.396	0.274	87.484	0.921	96.237	37.5491	11.7457
137	1.538	0.353	10.853	17.268	92.183	82.655	94.426	0.059	0.123	0.406	0.297	87.083	0.956	93.93	34.4379	11.5949
138	69.374	0.299	71.739	22.667	87.844	13.714	89.801	0.052	47.987	0.414	0.312	63.924	1.001	88.983	39.8651	10.0824
139	80.973	0.277	77.745	2.342	67.645	0.148	88.732	31.56	84.928	0.434	51.071	0.407	54.31	82.418	44.4993	9.91525
140	83.354	0.264	83.729	39.657	21.385	0.144	90.37	77.065	84.415	0.433	79.573	0.284	86.776	10.181	46.9736	10.5598
141	88.803	0.229	90.356	37.125	0.089	0.124	89.635	86.684	90.517	0.452	90.517	0.257	72.628	0.052	46.2477	11.6484
142	92.56	0.197	89.532	0.276	0.076	0.111	90.024	89.715	92.837	0.463	92.172	49.424	7.394	42.155	46.2097	11.5385
143	94.755	0.181	90.889	0.391	50.052	7.249	92.705	88.964	80.543	0.484	85.421	22.615	0.532	83.104	49.8489	11.1728
144	47.133	15.096	78.306	9.627	79.477	60.522	89.219	93.776	22.341	0.487	29.981	45.679	0.57	87.787	47.1429	9.22392
145	0.044	75.196	0.133	38.119	83.693	89.283	89.846	90.608	0.158	0.76	5.669	0.328	2.716	78.383	39.6383	11.1318
146	5.876	90.349	0.084	44.003	89.853	93.22	87.789	92.853	0.141	0.745	0.376	43.684	0.581	88.432	45.5704	11.4552
147	70.171	89.485	27.559	60.225	84.357	91.878	89.207	77.366	0.167	65.381	0.453	78.203	0.635	91.083	59.0121	9.59401
148	85.569	76.896	61.326	45.66	63.31	89.323	70.999	1.115	0.19	42.577	2.076	93.14	0.697	94.346	51.9446	9.86952
149	90.733	33.507	1.444	44.951	52.705	95.609	2.483	0.132	0.188	62.885	64.982	94.629	0.726	92.129	45.5074	10.4645
150	92.605	0.495	1.221	0.312	0.117	83.51	0.306	0.136	0.172	81.618	83.74	89.28	0.728	92.944	37.656	11.9486
151	92.821	0.496	32.102	0.393	0.1	21.388	5.763	0.138	0.145	71.315	87.269	91.385	0.707	89.335	35.2398	10.9408
152	92.135	0.525	59.296	27.598	0.101	0.249	57.776	0.146	0.14	59.098	84.642	84.244	0.709	89.586	39.7318	10.4262
153	90.27	16.098	7.761	41.868	0.1	0.248	5.832	0.149	0.807	50.765	83.597	42.256	0.688	81.951	30.1707	9.25211
154	90.378	55.435	7.527	34.379	0.095	0.239	0.172	0.145	50.082	0.69	93.359	0.282	0.713	87.688	30.0846	10.1427
155	92.084	0.795	7.46	0.422	0.09	0.233	0.154	0.139	54.76	0.781	91.28	0.33	0.747	91.178	24.3181	10.4572
156	93.246	0.527	11.556	37.589	0.085	40.172	32.2	0.136	63.205	0.819	90.956	0.366	0.765	89.016	32.9027	9.92529
157	97.815	0.497	77.139	61.192	0.082	84.855	70.989	0.131	54.335	0.845	88.056	0.372	0.77	92.062	44.9386	11.0972
158	91.279	0.484	82.382	82.725	53.926	92.83	93.208	0.13	59.288	0.863	86.994	0.378	0.788	95.412	52.9062	11.2847
159	16.553	0.474	88.452	90.797	79.654	96.119	95.513	0.126	69.08	0.866	40.758	53.926	0.799	92.328	51.8175	10.8245
160	0.176	0.461	97.766	89.809	90.087	94.798	92.144	0.125	76.015	0.868	0.269	6.017	0.802	89.401	45.6241	12.3777
161	18.767	0.452	91.563	81.641	88.267	91.369	92.325	0.121	78.562	0.846	0.974	3.323	0.802	86.352	45.3831	11.6901
162	75.076	0.417	87.709	84.974	89.1	85.413	91.552	0.116	72.105	0.837	67.702	8.849	0.797	87.249	53.7069	10.8077
163	90.203	0.382	17.687	92.002	92.137	95.051	92.436	0.113	86.225	0.852	84.79	55.253	0.808	21.154	52.0781	11.2754
164	87.206	0.353	0.056	89.52	90.184	86.482	88.387	0.104	88.447	0.829	88.725	30.916	26.486	0.039	48.4096	11.3843
165	81.41	0.311	0.044	92.745	51.587	29.295	87.383	0.097	89.873	0.844	88.964	0.314	82.469	4.694	43.5736	11.1481
166	3.12	0.28	54.325	93.174	0.096	0.15	81.779	0.09	62.161	0.839	90.393	0.289	64.256	72.759	37.4079	10.5345
167	0.19	0.227	46.544	93.621	0.069	0.127	58.519	0.079	20.521	0.843	87.319	0.3	14.417	88.076	29.3466	10.0303
168	0.439	0.168	10.783	97.425	0.053	0.105	0.268	0.062	0.354	0.847	88.724	0.298	0.536	89.098	20.6543	10.337
